# Supplementary material for: Immunological risk stratification and tailored minimisation of immunosuppression in renal transplant recipients
Source: BMC Nephrol. 2020 Mar 11;21:92. doi: 10.1186/s12882-020-01739-3 (PMC7065371; doi:10.1186/s12882-020-01739-3)
Supplement: Supplementary file 1 — Additional file 1. [file 12882_2020_1739_MOESM1_ESM.xlsx]

## Sheet: Sheet1
Black	Primary Renal Disease	Date of first RRT	Tx date	donortype	Living type	HLA antibody	patstatus	gftstatus	Initial regimen	CMV donor	CMV recipient	Primary CMV prophylaxis	Introduction of CMV prophylaxis (day)	Date of death	Cause of death	Date of graft loss	Cause of graft loss	Creat 3 Mo	GFR 3 mo (MDRD)	Creat 6 Mo	GFR 6 mo (MDRD)	Creat 1 yr	GFR 1 yr (MDRD)	Creat 2 yr	GFR 2 yr (MDRD)	Creat 3 yr	GFR 3 yr (MDRD)	Rejn(1st) day	Rejn (1st) grade	Rejn(2nd) day	Rejn (2nd) grade	Rejn(3rd) day	Rejn (3rd) grade	Protocol biopsy (day)	Protocol biopsy (result)	Protocol biopsy (complications)	Reasons for omitting protocol biopsy	GTT result (pre-Tx)	NODAT (day of onset)	NODAT (treatment)	Random blood glucose 3 mo	Random blood glucose 6 mo	Random blood glucose 1yr	Random blood glucose 2yr	Random blood glucose 3yr	Tac conc (d2/3)	Tac conc (d7)	Tac conc (d60)	Tac conc (d180)
				living	unrelated		A	W	low	data not avail	pos	no	n/a	n/a	n/a	n/a	n/a	113	57	119	54	113	57	117	55	95	74	n/a	n/a	n/a	n/a				mild acute tubular injury			normal	n/a	n/a	6.9	6.2	none	5.8	none	12	13.1	9.7	8.6
				DBD	n/a		A	w	low	pos	pos	no	n/a	n/a	n/a	n/a	n/a	387	13	211	27	222	25					108	1A	n/a	n/a			85	pyelonephritis	n/a	n/a				8.6	10.7	27.2			13.8	9	8.7	6
				DBD	n/a		A	W	low	data not avail	pos	no	n/a	n/a	n/a	n/a	n/a	154	39	135	45	139	43	132	46	120	51	42	borderline	n/a	n/a			ND	n/a	n/a	biopsy on 27/10 (51day), no rejection	normal	n/a	n/a	7	none	none	none	4.6	16	11.1	10.9	6.3
				living	unrelated		A	W	low	pos	pos	no	n/a	n/a	n/a	n/a	n/a	81	70.2	84	67.3	81	69.8	72	79.5	67	91	n/a	n/a	n/a	n/a			200	normal	n/a	n/a	normal	n/a	n/a	4.7	4.2	4.2	3.7	4.2	8.3	12.6	11.3	5
				DBD	n/a		LTF	LTF	low	pos	pos	no	n/a	LTF	LTF	LTF	LTF	239	25	lost to fu	lost to fu	lost to fu	lost to fu					n/a	n/a	n/a	n/a			ND	n/a	n/a	n/a	not done	n/a	n/a	lost to fu	lost to fu	lost to fu			8.1	12.6	lost to fu	lost to fu
				living	related		A	W	low	pos	neg	yes	1	n/a	n/a	n/a	n/a	579	10	335	18	295	21	na	na	na	na	7	2B	n/a	n/a			42	Mild IFTA	n/a	n/a		na	na	4.1	4.9	5	5.2	na	9.9	5.2	7	off Tac now
				living	related		A	F	low	neg	neg	no	n/a	n/a	n/a	2012-10-26	renal artery thrombosis	n/a	n/a	n/a	n/a	n/a	n/a	n/a	n/a	n/a	n/a	n/a	n/a	n/a	n/a			na	n/a	n/a	n/a	n/a	n/a	n/a	n/a	n/a	n/a	n/a	n/a	15	n/a	n/a	n/a
				DBD	n/a		A	F	low	pos	pos	no	n/a	n/a	n/a	2013-01-02	sepsis, vascular rejection	n/a	n/a	n/a	n/a	n/a	n/a	n/a	n/a	n/a	n/a	70	2A	n/a	n/a			n/a	n/a	n/a	n/a				7.9	n/a	n/a	n/a	n/a	12.5	23.6	4.8	n/a
				DBD	n/a		RIP	RIP	low		pos	no	n/a	2012-11-25	sepsis from infected peri-transplant collection (enterococcus)	n/a	n/a	na	n/a	na	na	na	na					n/a	n/a	na	na			na	patient died on 25-11-2012	na	na		diabetic pre-Tx	na	na	na	na	na	na	32	32	9.1	na
				DBD	n/a		A	Tx nephrectomy dec 2011, heavy proteinuria, nephrotic syndrome attributed to the donor	low		neg	no	n/a	n/a	n/a	2011-12-01	primary non function, Heavy proteinuria attributed to the donor, FSGS				na	na	na	na	na	na	na	n/a	n/a	n/a	n/a			na	na	na		na	na							8.3	18.4	7.7	na
				living	related		A	w	low	pos	neg	yes	1	n/a	n/a	n/a	n/a	106	72									n/a	n/a	n/a	n/a			not done	na	na	Indicated Bx on D36-normal	na	na	na	7.1	na	na	na	na	11.9	8.8	6.2	na
				living	related		A	w	low	neg	pos	no	n/a	n/a	n/a	n/a	n/a	116	66									n/a	n/a	n/a	n/a			not done	na	na	marked white coat hypertension	na	na	na	4.7	na	na	na	na	12	9.2	9.3	na
				DCDx2	n/a		A	W	low	pos	pos	no	n/a	n/a	n/a	n/a	n/a	150	39	na	na							n/a	n/a	na	na			not done	na	na	lymphocele requiring drainage	na	na	na	6.9	na	na	na	na	14.6	12.8	7.2	na
				living	related		A	w	low	neg	neg	no	n/a	n/a	n/a	n/a	n/a	99	69.1	106	63.9	110	60					n/a	n/a	n/a	n/a			92	NAD	n/a					5.7	5.5	6			4.4	4	10.2	n/a
				DBD	n/a		A	W	low	neg	pos	no	n/a	n/a	n/a	n/a	n/a	231	26	196	32	197	31					no	n/a	n/a	n/a			111	tac toxicity	n/a	n/a	normal	n/a	diet when having MP	5	5	4.5			8.2	8.4	9.3	n/a
				DCD	n/a		A	w	low		pos	no	n/a	n/a	n/a	n/a	n/a	168	37	147	44	148	43	na	na	na	na	n/a	n/a	n/a	n/a			93	normal	nil	na		na	na	5.3	4.7	4.8	na	na	14.4	20.3	10.3	8.6
				living	unrelated		A	w	low		neg	no	n/a	n/a	n/a	n/a	n/a	95	53	74	70.7	76	68.3	na	na	na	na	n/a	n/a	n/a	n/a			97	normal	na	na		na	na	4.4	3.3	4.3	4.9	na	11.9	11.2	7.5	5.6
				living	unrelated		A	w	low	Neg	Neg	No	n/a	n/a	n/a	n/a	n/a	139	47	126	53	125	53	na	na	na	na	5	1A	n/a	n/a			112	normal	nil	na		na	na	5.5	5.6	4.7	na	na	14.6	9.4	7.6	6.4
				living	related		A	w	low		pos	no	n/a	n/a	n/a	n/a	n/a	136	46	145	42	125	50	na	na	na	na	n/a	n/a	n/a	n/a			92	normal	nil	na	na	na	na	4.6	4.8	4.9	5.3	na	15.1	10.1	11.3	7.8
				living	related		A	w	low	neg	neg	no	n/a	n/a	n/a	n/a	n/a	124	59	124	59	111	66.6	na	na	na	na	n/a	n/a	n/a	n/a			97	normal	nil	na		na	na	4.9	3.8	4.6	5.3	na	7.9	9.1	12.1	9.3
				DCD	n/a		A	w	low	pos	neg	yes	1	n/a	n/a	n/a	n/a	110	61.5	108	62.5	105	64.6	na	na	na	na	n/a	n/a	n/a	n/a			87	normal	nil	na	Known DM	na	na	11.1	20.5	10.5	4.6	na	6.7	15.5	9.5	5.6
				living	related		A	w	low	neg	neg	no	n/a	n/a	n/a	n/a	n/a	179	40	160	44	165	43	na	na	na	na	n/a	n/a	n/a	n/a			79	Non diagnostic	no kidney	no kidney tissue on protocol Bx		na	na	5.8	4.5	na	na	na	15.1	14	8.5	8
				DCD	n/a		A	w	low		pos	no	n/a	n/a	n/a	n/a	n/a	89	61.9	80	70	72	78.6	na	na	na	na	n/a	n/a	n/a	n/a			not done	na	na	patient choice		na	na	4	3.8	4.9	na	na	12	6.7	10	8.7
				living	related		A	w	low		pos	no	n/a	n/a	n/a	n/a	n/a	94	53	94	53	88	57	93	53	na	na	n/a	n/a	n/a	n/a			not done	na	na	patient choice		N/A	N/A	4.2	5.3	4	3.9	na	8.6	14.3	10.3	9.1
				DCD	n/a		A	w	low	pos	pos	No	n/a	n/a	n/a	n/a	n/a	110	46	79	66.8	86	60.3	81	64.4	na	na	n/a	n/a	n/a	n/a			not done	na	na	Indicated Bx 8wks post Tx-normal, complex vascular anatomy and rec UTIs		N/A	N/A	5.1	5.4	5.3	5.8	na	8.7	18.5	12.7	5.3
				living	related		A	w	low	pos	Neg	yes	1	n/a	n/a	n/a	n/a	162	43	158	45	148	47	na	na	na	na	n/a	n/a	n/a	n/a			111	normal	nil	na		na	na	4.2	4.1	5	4.3	na	10.7	9.2	9.7	6.6
				living	related		A	w	low	pos	Neg	yes	1	n/a	n/a	n/a	n/a	109	74.6	93	89.5	91	89.2	na	na	na	na	n/a	n/a	n/a	n/a			92	normal	nil	na		na	na	6	4.6	6.6	4.5	na	18.1	15.6	9.6	6.7
				living	related		A	w	low		pos	no	n/a	n/a	n/a	n/a	n/a	197	34	133	59	119	59.7	na	na	na	na	n/a	n/a	n/a	n/a			43	normal	nil	early clinically indicated biopsy performed which was normal		na	na	4.8	4.8	4.7	5.9	na	11.4	11	7.8	7.5
				DBD	n/a		A	w	low		neg	no	n/a	n/a	n/a	n/a	n/a	150	45	137	50	120	57	na	na	na	na	94	1A	n/a	n/a			94	1A	nil	na		na	na	4.5	4.8	4.7	4.9	na	5.7	7.9	10.1	12.2
				living	related		A	w	low	pos	pos	no	n/a	n/a	n/a	n/a	n/a	114	56.6	81	84	85	79.2	na	na	na	na	90	1A	n/a	n/a			125	1A	none	na	normal	na	na	6.2	5.1	4.9	na	na	14.6	13.4	11	9.8
				living	related		A	w	low		pos	no	n/a	n/a	n/a	n/a	n/a	140	44	118	3.5	126	49	118	53	na	na	88	1A	n/a	n/a			88	1A	nil			NA	N/A	5	3.5	na	na	na	10.9	10.1	9.7	6.3
				living	related		A	w	low		pos	no	n/a	n/a	n/a	n/a	n/a	90	55	85	58	83	59	na	na	na	na	95	1A	n/a	n/a			95	1A	na	na	na	NA	N/A	5.2	5.6	5.9	5.1	na	30	21.3	9.5	8.5
				DCD	n/a		A	w	low		pos	no	n/a	n/a	n/a	n/a	n/a	157	48	142	54	125	63.6	na	na	na	na	n/a	n/a	n/a	n/a			88	normal	nil	na		na	na	7.2	5.4	3.4	6.1	na	25.6	12.6	10.3	5.5
				living - altruistic	unrelated		A	w	low	neg	neg	no	n/a	n/a	n/a	n/a	n/a	128	54	94	76.3	85	85.3	na	na	na	na	n/a	n/a	n/a	n/a			not done	na	na	persistent anaemia-EBV and Parvovirus DNA positive, protocol Bx not done	Known DM	na	na	6.9	14.8	13.1	na	na	22.1	10.1	7.1	6.7
				living	related		A	w	low	neg	neg	no	n/a	n/a	n/a	n/a	n/a	114	58	120	54	129	50	138	46	142	45	44	2A	n/a	n/a			141		na	rejection 54days post tx rebiopsy d141	IGT	40	metformin	8.3	8.1	9.8	5.8	5.2	10.2	14.6	9.2	8.7
				living	related		A	w	low		neg	no	n/a	n/a	n/a	n/a	n/a	170	38	106	65.5	112	61.2	na	na	na	na	99	1A	n/a	n/a			99	1A	na	na		na	na	5.3	5.3	6.2	5.8	na	17.8	10.5	10.6	7.3
				DBD	n/a		A	W	low	neg	pos	no	n/a	n/a	n/a	n/a	n/a	88	55	87	55							n/a	n/a	n/a	n/a			107	NAD, suboptimal vascular	n/a	n/a				6.6	6.6				32	27.2	9.6	7.4
				living - altruistic	unrelated		A	w	low	neg	pos	yes	1	n/a	n/a	n/a	n/a	108	67.5	116	62.1	149	46					n/a	n/a	n/a	n/a			86	NAD	n/a	n/a				5.9	5.6	5.2			12	9.1	15.6	2.9
				DBD	n/a		A	W	low	neg	pos	no	n/a	n/a	n/a	n/a	n/a	176	34	164	37							n/a	n/a	n/a	n/a			100	NAD	n/a	n/a				4.7	4.5				10.2	12.6	14.8	11.6
				DBD	n/a		A	W	low	pos	neg	yes	1	n/a	n/a	n/a	n/a	173	36	118	55							n/a	n/a	n/a	n/a			92	NAD	n/a	n/a				4.8	8.2				9.3	4.4	7.1	9
				DCD	n/a		A	W	low	neg	pos	no	n/a	n/a	n/a	n/a	n/a	84	58	91	53							n/a	n/a	n/a	n/a			96	NAD	n/a	n/a				8	6.7				16.2	32	10.8	8.4
				DBD	n/a		A	w	low	neg	pos	no	n/a	n/a	n/a	n/a	n/a	82.1	73	99	54	103	52					n/a	n/a	n/a	n/a			96	NAD	n/a	n/a				6.4	6.5				4.7	<2.0	7.1	8.4
				DBD	n/a		A	W	low	pos	pos	no	n/a	n/a	n/a	n/a	n/a	107	64.5	75	77							n/a	n/a	n/a	n/a			104	NAD	n/a	n/a		14	gliclazide	8.8	9				29.5	11.4	3	8.4
				DBD	n/a		A	W	low		pos	no	n/a	n/a	n/a	n/a	n/a	109	47	109	47							n/a	n/a	n/a	n/a			92	NAD	n/a	n/a				5.1	5.2				15.2	6	9.7	6.4
				living	related		A	w	low	pos	pso	no	n/a	n/a	n/a	n/a	n/a	102	50	99	52	91	57					n/a	n/a	n/a	n/a			92	inadequate, NAD	n/a	n/a				4.1	4.4	4.7			10.6	6.3	12.4	3
				DCD	n/a		A	w	low	neg	neg	no	n/a	n/a	n/a	n/a	n/a	208	36	169	45.6	174	44.4					n/a	n/a	n/a	n/a			94	inadequate	n/a	n/a				5.1	7.2	5.1			13.5	9.1	6	10.6
				living	related		A	W	low	neg	neg	no	n/a	n/a	n/a	n/a	n/a	132	51	124	55	116	59					n/a	n/a	n/a	n/a			92	inadequate	n/a	n/a				5.4	4.9	4.1			19.8	9	14.8	<2.0
				living - altruistic	unrelated		A	W	low	pos	pos	no	n/a	n/a	n/a	n/a	n/a	114	48	101	55.2	109	50.4					n/a	n/a	n/a	n/a			86	inad vasc, NAD	n/a	n/a		known diet DM	gliclazide	7	12	8.3			14.5	12.8	8	6.2
				DCD	n/a		A	W	low	pos	pos	no	n/a	n/a	n/a	n/a	n/a	155	40	151	41							n/a	n/a	n/a	n/a			88	normal	na	na	na	na	na	5.3	5.2	na	na	na	16.6	14.5	10.3	11.2
				DBD	n/a		A	w	low		pos	no	n/a	n/a	n/a	n/a	n/a	80	66	67	81							n/a	n/a	n/a	n/a			91	normal	na	na	na	na	na	5	4.2	na	na	na	14.4	7.6	8.2	8
				DBD	n/a		A	W	low	neg	pos	no	n/a	n/a	n/a	n/a	n/a	125	52	109	64							n/a	n/a	n/a	n/a			94	normal	na	na	na	na	na	6.5	4.5	na	na	na	20.6	8.3	9.6	7.7
				DBD	n/a		A	W	low	pos	neg	yes	1	n/a	n/a	n/a	n/a	115	65	123	57							n/a	n/a	na	na			89	normal	na	na	na	na	na	5.9	5	na	na	na	8.4	13	8.8	7.3
				DBD	n/a		A	w	low	pos	pos	no	n/a	n/a	n/a	n/a	n/a	90	59	75	77							n/a	n/a	n/a	n/a			92	normal	na	na	na	na	na	5.6	5.5	na	na	na	6.2	9.6	7.2	7.3
				living	related		A	w	low	neg	neg	no	n/a	n/a	n/a	n/a	n/a	78	69	76	71							n/a	n/a	n/a	n/a			90	normal	na	na	na	diabetic pre-Tx	na	diabetic pre tx	na	na	na	na	18.9	12.3	11.3	7.1
				DCD	n/a		A	W	low	pos	pos	no	n/a	n/a	n/a	n/a	n/a	116	65	110	65							n/a	n/a	n/a	n/a			83	normal	na	na	na	na	na	3.9	7.5	na	na	na	17.3	10.9	9.1	5.6
				DBD	n/a		A	W	low		pos	no	n/a	n/a	n/a	n/a	n/a	125	54	122	56							n/a	n/a	n/a	n/a			93	normal	na	na	na	na	na	5	4.4	na	na	na	10.8	12.7	9.7	5.2
				DBD	n/a		A	w	low		pos	no	n/a	n/a	n/a	n/a	n/a	119	59	97	74.4	101	75					n/a	n/a	n/a	n/a			91	normal	na	na		591	na	7.3	7	9	na	na	5.6	12.4	8.7	7.4
				living	related		A	w	low	pos	pos	no	n/a	n/a	n/a	n/a	n/a	112	57	103	62.9	108	59.5	na	na	na	na	n/a	n/a	n/a	n/a			109	normal	1st attempt, no kidney			na	na	5.6	4.7	6.1	7.4	na	18.4	17.7	8.2	4.8
				living	unrelated		A	w	low	neg	neg	no	n/a	n/a	n/a	n/a	n/a	170	37	142	45	144	44	na	na	na	na	n/a	n/a	n/a	n/a			55	normal	na	na		diabetic pre Tx	na	8.1	diabetic pre Tx				32	18.8	12.2	8
				living	related		A	w	low	neg	pos	no	n/a	n/a	n/a	n/a	n/a	152	57	137	57	133	59					n/a	n/a	n/a	n/a			113	normal	na	na		na	na	4.7	4.9	4.8	na	na	5.7	10.4	6.6	6.8
				living	related		A	w	low	pos	pos	no	n/a	n/a	n/a	n/a	n/a	89	83.9	81	93.5	124	58					n/a	n/a	n/a	n/a			97	normal	na	na		na	na	4.4	4.9	4.3	na	na	12.6	14.9	9.3	7.6
				living	unrelated		A	w	low	neg	pos	no	n/a	n/a	n/a	n/a	n/a	112	45	117	42	121	41	na	na	na	na	n/a	n/a	n/a	n/a			99	normal	na	na		na	na	8.6	na	na	7.9	na	6.4	10.2	10.1	6.3
				DBD	n/a		A	w	low	neg	pos	no	n/a	n/a	n/a	n/a	n/a	104	83	112	81	96	96					n/a	n/a	n/a	n/a			93	normal	na	na		na	na	4.5	4.3	4.5	na	na	8.8	11.6	10.3	6.3
				living	related		A	w	low	pos	pos	no	n/a	n/a	n/a	n/a	n/a	79	76.4	70	87.9	64	104					n/a	n/a	n/a	n/a			95	normal	na	na		diabetic pre-Tx	na	5.3	8				16.4	10.6	8.1	8.2
				DBD	n/a		A	w	low	neg	pos	no	n/a	n/a	n/a	n/a	n/a	146	42	119	53	126	49					n/a	n/a	n/a	n/a			100	normal	na	na		na	na	4.9	5.4	4.8	na	na	18.2	12	10.1	6.9
				living	related		A	w	low	pos	pos	no	n/a	n/a	n/a	n/a	n/a	84	83.6	81	87.1	67	115	na	na	na	na	n/a	n/a	n/a	n/a			91	normal	na	na		diabetic pre Tx	na	na	na	na	na	na	11.4	9.2	9.9	6.3
				DBD	n/a		A	w	low	neg	pos	no	n/a	n/a	n/a	n/a	n/a	204	36	158	48	154	49.2					n/a	n/a	n/a	n/a			98	normal	na	na		na	na	5.2	4.7	5.2	na	na	19.1	11.1	10.2	5.8
				DBD	n/a		A	w	low	pos	pos	no	n/a	n/a	n/a	n/a	n/a	88	59.5	70	77.5	83	63.4	na	na	na	na	n/a	n/a	n/a	n/a			108	normal	na	na		na	na	6.5	6.2	5.7	7.2	na	8.7	12	9.6	5.4
				living	related		A	w	low	neg	neg	no	n/a	n/a	n/a	n/a	n/a	96	57	74	76.2	102	53					n/a	n/a	n/a	n/a			92	normal	na	na		na	na	5.5	5.5	5.5	na	na	10.6	13.6	10.2	9.7
				DBD	n/a		A	w	low	pos	pos	no	n/a	n/a	n/a	n/a	n/a	70	77	72	77	79	67					n/a	n/a	n/a	n/a			85	normal	na	na		na	na	5.9	6	7.1	na	na	11.4	18.6	10.2	4.1
				living	related		A	w	low	pos	neg	yes	1	n/a	n/a	n/a	n/a	106	45	81	65	80	66					n/a	n/a	n/a	n/a			89	normal	na	na		na	na	5.8	6	6.1	na	na	18.7	7.8	9.2	10.1
				DBD	n/a		A	w	low	neg	pos	no	n/a	n/a	n/a	n/a	n/a	67	114	66	115	65	117					n/a	n/a	na	na			96	normal	na	na		diabetic pre-Tx	na	diabetic pre Tx					11.5	8.6	9.7	5.4
				DBD	n/a		A	w	low	neg	pos	no	n/a	n/a	n/a	n/a	n/a	123	55	113	59.8	118	57	na	na	na	na	n/a	n/a	n/a	n/a			94	normal	na	na		na	na	4.5	5.7	6.4	na	na	13.7	22.4	11.1	5.8
				living - paired	unrelated		A	w	low	pos	pos	no	n/a	n/a	n/a	n/a	n/a	109	45	95	53	104	48					n/a	n/a	na	na			98	normal	na	na		na	na	na	5.5	5.2	na	na	18.9	19	9.9	7.1
				living	unrelated		A	w	low	neg	neg	no	n/a	n/a	n/a	n/a	n/a	144	44	105	67	105	67					n/a	n/a	n/a	n/a			84	normal	na	na		na	na	4.7	5.5	5.4	na	na	13	10.4	8	7.1
				DCD	n/a		A	w	low		pos	No	n/a	n/a	n/a	n/a	n/a	132	51	117	59	95	73.4	97	71.4	96	76	n/a	n/a	n/a	n/a			90	normal	na	na		N/A	N/A	4.4	3	5.2	4.5	na	20.4	13.6	9.4	6.4
				DCD	n/a		A	w	low	neg	pos	no	n/a	n/a	n/a	n/a	n/a	140	48	125	54	127	53					n/a	n/a	n/a	n/a			96	normal	na	na		na	na	6	5.6	6.2	na	na	11.6	8.2	9.7	7.9
				DBD	n/a		A	w	low	pos	pos	no	n/a	n/a	n/a	n/a	n/a	73	74.8	61	92	64	92	na	na	na	na	n/a	n/a	n/a	n/a			93	normal	na	na		na	na	5.5	5.4	5.4	na	na	9.6	9.5	8.1	7.6
				DBD	n/a		A	w	low	?	?	no	n/a	n/a	n/a	n/a	n/a	150	43	140	46	117	57					n/a	n/a	n/a	n/a			92	no renal tissue	no renal tissue	no renal tissue, not re-attempted		na	na	8	5.6	5.7	na	na	24.1	22.4	9.2	5.9
				living	related		A	w	low	pos	pos	no	n/a	n/a	n/a	n/a	n/a	101	51	119	42	100	51					n/a	n/a	n/a	n/a			89	no rejection. Some increase in glom cellularity-mesangial and endothelial with some endothelial swelling, few neutrophils. C4D neg.no pertubular capiullaritis.	1st bx no tissue. Repeated few days later	na		na	na	5.4	4.8	5.2	na	na	14.1	10.4	9.6	6.7
				DBD - dual	n/a		A	W	low	neg	pos	no	n/a	n/a	n/a	n/a	n/a	157	31	na	na							n/a	n/a	na	na			na	na	na	indicated Bx on D36- normal. Dual DBD tx, high risk, 3/12 protocol Bx not done.		na	na	6.6	na	na	na	na	16.6	7.1	9.3	na
				DBD	n/a		A	w	low	pos	pos	no	n/a	n/a	n/a	n/a	n/a	163	37	130	48							n/a	n/a	n/a	n/a			na	na	na	Indicated Bx on D77- mild IFTA		na	na	5.8	5.2	na	na	na	32	15.1	10.8	6.6
				DCD	n/a		A	w	low	pos	neg	yes	1	n/a	n/a	n/a	n/a	151	40	143	43							n/a	n/a	n/a	n/a			na	na	na	indicated bx d76 normal	na	na	na	5.2	6.6	na	na	na	32	16	9.6	6.6
				DBD	n/a		A	w	low	pos	pos	no	n/a	n/a	n/a	n/a	n/a	155	48	163	45	140	53	na	na	na	na	n/a	n/a	n/a	n/a			not done	na	na	indicated biopsy at 6 wks normal, patient refused further Bx at 3/12		na	na	6.7	5.2	4.5	na	na	9.5	13.9	9.7	6.1
				DCD	n/a		A	w	low	neg	neg	no	n/a	n/a	n/a	n/a	n/a	99	51	85	60.2	91	56	na	na	na	na	n/a	n/a	n/a	n/a			not done	na	na	lymphocele requiring betadine sclerotherapy		na	na	5.1	4.7	4.4	na	na	11	12.7	10.4	8.9
				living	related		A	w	low	?	?	no	n/a	n/a	n/a	n/a	n/a	171	27	160	30	134	36					n/a	n/a	n/a	n/a			not done	na	na	indicated Bx on 7-8-2012-normal		na	na	6.3	6.5	4.5	na	na	20.4	6.2	9.8	6.8
				living - altruistic	unrelated		A	w	low	pos	pos	no	n/a	n/a	n/a	n/a	n/a	102	67	100	68	128	49					n/a	n/a	n/a	n/a			99	few lymphocytic infiltrates not amounting to borderline, significant donor vasculopathy.	na	na		na	na	6.1	4.9	5.6	na	na	12.1	12.6	8.9	4.5
				DBD	n/a		A	w	low	pos	pos	no	n/a	n/a	n/a	n/a	n/a	90	61.5	66	87.9	50	129					n/a	n/a	n/a	n/a			107	borderline rej	na	na		na	na	4.8	5.4	5.8	na	na	3.5	6.4	15.7	7.9
				DCD	n/a		A	W	low		pos	no	n/a	n/a	n/a	n/a	n/a	235	24	161	36	146	40					n/a	n/a	n/a	n/a			141	Tac tox, mod arterial hyalinosis	n/a	n/a		n/a	n/a	8.8	6.6	8.6			16.8	14.6	6.2	5.2
				DCD	n/a		A	W	low	neg	pos	no	n/a	n/a	n/a	n/a	n/a	93	92.6	79	111.8	72	123.9					n/a	n/a	n/a	n/a			104	normal, suboptimal vascular	n/a	n/a		n/a	n/a	5	5.3	5.4			8.8	9.1	10.2	7.5
				DBD	n/a		A	W	low	neg	pos	no	n/a	n/a	n/a	n/a	n/a	79	63.6	73	69.6	72	70.5					n/a	n/a	n/a	n/a			88	normal	n/a	n/a				4.6	5.4	5.2			15.8	7.8	9.2	8.9
				living	unrelated		A	W	low	neg	neg	no	n/a	n/a	n/a	n/a	n/a	117	58	105	65.1	97	71.4	86	87			n/a	n/a	n/a	n/a			98	normal	n/a	n/a	normal	n/a	n/a	5.5	none	4.9	4.9		14.7	9.7	8.3	5.9
				living	related		A	w	low	neg	neg	no	n/a	n/a	n/a	n/a	n/a	156	44	128	56	140	50					n/a	n/a	n/a	n/a			83	normal	n/a	n/a	normal	n/a	n/a	none	none	none			6.4	7.7	8.9	16.3
				DCD	n/a		A	W	low	pos	pos	no	n/a	n/a	n/a	n/a	n/a	77	64.5	55	94.8	56	92.8					n/a	n/a	n/a	n/a			94	normal	n/a	n/a		n/a	n/a	5.7	4.5	4.5			4.2	25.9	11.5	8.2
				DBD	n/a		A	w	low		pos	yes (in error)	1	n/a	n/a	n/a	n/a	84	58	90	57	81	64					n/a	n/a	n/a	n/a			142	normal	n/a	dlayed by 8 days BP raised on 1st attempt	IGT	n/a	n/a	5.9	none	5.6			32	7	10.6	7.3
				DBD	n/a		A	w	low	pos	pos	no	n/a	n/a	n/a	n/a	n/a	122	56	115	60	115	59					n/a	n/a	n/a	n/a			100	normal	nil	na		na	na	4.9	4.6	5.5	na	na	15.7	11.5	8.8	6.3
				living - altruistic	unrelated		A	W	low	pos	pos	no	n/a	n/a	n/a	n/a	n/a	90	79.5	87	82.7	82	88.1					n/a	n/a	n/a	n/a			92	normal	n/a	n/a	DM	DM	n/a	6.3	6.6	9.6			18.4	15.3	9.1	7.2
				DCD	n/a		A	W	low		pos	no	n/a	n/a	n/a	n/a	n/a	115	58	105	66	98	71.1					n/a	n/a	n/a	n/a			93	normal	n/a	n/a		n/a	n/a	6.1	5.6	6.8			13.5	9.4	10.8	7.9
				DBD	n/a		A	W	low	neg	neg	no	n/a	n/a	n/a	n/a	n/a	79	93.1	77	95.9	69	107.9					n/a	n/a	n/a	n/a			92	normal	n/a	n/a		n/a	n/a	5	5.4	4.8			13.7	12.8	7.2	9.1
				living - paired	unrelated		A	W	low	??	neg	no	n/a	n/a	n/a	n/a	n/a	139	46	118	55	111	55					n/a	n/a	n/a	n/a			85	normal	n/a	n/a	normal	n/a	n/a	4.1	3.9	3.8			13.6	11.4	10.1	6.7
				DBD	n/a		A	W	low		pos	no	n/a	n/a	n/a	n/a	n/a	171	35	130	48	130	48					n/a	n/a	n/a	n/a			91	normal	n/a	n/a				10.8	7.5	8.6			11.3	15.3	9.8	6.9
				living - paired	unrelated		A	W	low	pos	neg	no	n/a	n/a	n/a	n/a	n/a	180	24	139	32	115	40					n/a	n/a	n/a	n/a			92	normal	n/a	n/a				5.5	7	5.5			16.4	11	11.8	5.3
				DBD	n/a		A	w	low	neg	pos	no	n/a	n/a	n/a	n/a	n/a	93	51	91	52							n/a	n/a	n/a	n/a			112	normal	n/a	n/a	Known DM	n/a T2DM	n/a	5.2	none				32	15.6	14.2	7.9
				DBD	n/a		A	w	low	neg	pos	no	n/a	n/a	n/a	n/a	n/a	89	57	82	90							n/a	n/a	n/a	n/a			129	normal	n/a	n/a	normal	n/a	n/a	6.4	4.7				27	9.1	7.8	5.9
				DCD	n/a		A	w	low	neg	pos	no	n/a	n/a	n/a	n/a	n/a	192	30	182	32	186	31					n/a	n/a	n/a	n/a			87	borderline rejection	n/a	n/a	normal	n/a	n/a	5.3	none	4.5			13.1	12.1	8.2	5.8
				DBD	n/a		A	W	low	pos	neg	yes	1	n/a	n/a	n/a	n/a	148	40	133	46	116	53					87	borderline	n/a	n/a			87	borderline ACR	n/a	n/a		n/a	n/a	3	4.4	4.4			7.1	10.6	12.7	5.5
				living	related		A	W	low	neg	neg	no	n/a	n/a	n/a	n/a	n/a	127	64	115	72	116	71					n/a	n/a	na	na			79	some infiltrates, ?resolving rej	na	na		8	gliclazide and insulin	11.4	6.4	4.5	na	na	7.7	5.7	10	8.8
				DCD	n/a		A	W	low	pos	pos	no	n/a	n/a	n/a	n/a	n/a	110	60.7	94	77							n/a	n/a	n/a	n/a			100	NAD, suboptimal vascular	n/a	n/a				5.9	5.4				8.7	5.3	11.2	6.3
				DBD	n/a		A	w	low		pos	no	n/a	n/a	n/a	n/a	n/a	110	56	106	59	118	52					n/a	n/a	n/a	n/a			100	NAD	haematuria (resolved)	n/a				5.9	5	5.1			23.6	21.6	16.4	8.2
				DBD	n/a		A	w	low	neg	pos	no	n/a	n/a	n/a	n/a	n/a	95	50	109	42	110	42					n/a	n/a	n/a	n/a			ND	n/a	n/a	?why				11.3	18.8	9.9			26.8	13	7.9	3.9
				DCD	n/a		A	W	low		pos	no	n/a	n/a	n/a	n/a	n/a	248	23	152	41							n/a	n/a	n/a	n/a			84	interstitial fibrosis and mild to moderate arteriosclerosis	n/a	n/a				8.6	5.6				20	8.7	11.8	7.6
				DBD	n/a		A	w	low	pos	neg	yes	1	n/a	n/a	n/a	n/a	112	57	123	51	130	48					112	1A	n/a	n/a			112	1A	n/a	n/a				5.5	5.9	5.9			23.2	13.1	14	5.2
				DBD	n/a		A	w	low	pos	pos	no	n/a	n/a	n/a	n/a	n/a	92	77.2	78	93.4	82	93	na	na	na	na	n/a	n/a	n/a	n/a			96	normal	na	na		10	gliclazide	5.3	4.4	4.1	na	na	11.3	16	8.5	7
				DCD	n/a		A	w	low		pos	no	n/a	n/a	n/a	n/a	n/a	133	49	115	58	128	51					n/a	n/a	na	na			96	normal	na	na		na	na	4.9	6.2	na	na	na	21.3	11.5	9.6	7.9
				DBD	n/a		A	W	low		pos	no	n/a	n/a	n/a	n/a	n/a	127	48	129	47							n/a	n/a	n/a	n/a			91	NAD, arteriosclerosis (on implant bx)	n/a	n/a				7.1	5.9				20.6	5.8	6.2	3.7
				living	unrelated		A	W	low	pos	pos	no	n/a	n/a	n/a	n/a	n/a	100	69	93	75							n/a	n/a	na	na			92	Borderline rej	na	na	na	na	na	5.9	6.2	na	na	na	27.6	8.2	9.2	7.3
				living	related		A	W	low	neg	neg	no	n/a	n/a	n/a	n/a	n/a	112	59	124	52	129	50	110	59			n/a	n/a	n/a	n/a			69	only 6 glomeruli	n/a	n/a	normal	n/a	n/a	none	4.5	4.5	none		10.6	9.2	9.5	6.2
				DBD	n/a		RIP	RIP	low	?	pos	no	n/a	2012-03-16	MI	n/a	n/a	139	46	143	44	n/a	n/a	n/a	n/a	n/a		n/a	n/a	n/a	n/a			93	normal	n/a	n/a	normal	n/a	n/a	5.1	5.7	n/a	n/a	n/a	8	12.1		5.7
				DBD	n/a		RIP	RIP	low	pos	pos	no	n/a	8.9.12	cancer	n/a	n/a	108	57	103	61.4	n/a	n/a					n/a	n/a	n/a	n/a			106	normal	n/a	n/a	known DM	n/a	n/a	14	8.2	n/a			13.8	12.6	5.7	6.4
				DBD	n/a		A	w	low	pos	pos	no	n/a	n/a	n/a	n/a	n/a	160	42	102	74	113	66					n/a	n/a	n/a	n/a			202	normal	n/a		normal	n/a	n/a	5.2	5	none			12.9	9.6	11	8.3
				living	unrelated		A	w	low	neg	neg	no	n/a	n/a	n/a	n/a	n/a	124	39	119	41	109	45					n/a	n/a	n/a	n/a			165	normal	haematuria	n/a	normal	n/a	n/a	5.9	none	6.4			18.2	32	9.2	8.8
				DBD	n/a		A	W	low	pos	pos	no	n/a	n/a	n/a	n/a	n/a	86	58	92	54	91	54	80	67			n/a	n/a	n/a	n/a			104	normal	n/a	n/a	IGT	n/a	n/a	4.9	5.6	6.2	none		32	22.6	12.1	7.3
				DCD	n/a		A	w	low	neg	pos	no	n/a	n/a	n/a	n/a	n/a	89	80	100	76	93	70					n/a	n/a	n/a	n/a			97	normal	urine retention	n/a	IGT	n/a	n/a	none	6.2	4.9			14.7	10	9.5	12.9
				DBD	n/a		A	W	low	neg	pos	no	n/a	n/a	n/a	n/a	n/a	111	58	104	63.2	112	58	109	59			n/a	n/a	n/a	n/a			138	normal	n/a	n/a	not done	n/a	n/a	none	none	none	5.3		11.5	10.8	11	7.8
				living	unrelated		A	W	low	pos	pos	no	n/a	n/a	n/a	n/a	n/a	71	99.5	75	93.4	73	96.1	70	100.5			n/a	n/a	n/a	n/a			93	normal	n/a	n/a	DM	n/a	n/a	8.7	7.5	5.1	10		19.1	10.8	16.2	7.4
				DCD	n/a		A	W	low	no data available	neg	no	n/a	n/a	n/a	n/a	n/a	68	90	67	91.6	70	86.4	79	79			n/a	n/a	n/a	n/a			207	normal	n/a	biopsy delayed due to beds & childcare	not done	n/a	n/a	none	4.6	none	none		9.2	11.5	9.1	8.7
				DBD	n/a		A	W	low	neg	neg	no	n/a	n/a	n/a	n/a	n/a	173	35	168	36	133	47	138	45			n/a	n/a	n/a	n/a			71	normal	n/a	n/a	normal	n/a	n/a	none	5.5	none	none		7.7	11.9	8.3	6.6
				living	unrelated		A	W	low	pos	pos	no	n/a	n/a	n/a	n/a	n/a	121	51	128	48	120	52	122	51	100	67	n/a	n/a	n/a	n/a			112	normal	n/a	n/a	normal	n/a	n/a	6.7	5.8	none	none	5.1	18.2	9.5	9	7.2
				living	related		A	W	low	pos	pos	no	n/a	n/a	n/a	n/a	n/a	127	39	112	45	97	54	108	47			n/a	n/a	n/a	n/a			93	normal	n/a	n/a	normal	n/a	n/a	4.1	4.2	4.7	5.2		11.7	10.7	10.7	7.7
				DBD	n/a	HLA-B13	A	W	low	neg	neg	no	n/a	n/a	n/a	n/a	n/a	132	36	113	43	92	54					n/a	n/a	n/a	n/a			83	normal	n/a	n/a	normal	n/a	n/a	none	none	5			15.7	8.8	9.1	9
				living	related		A	w	low	neg	neg	no	n/a	n/a	n/a	n/a	n/a	184	34	136	50	138	50					n/a	n/a	n/a	n/a			180	no rejection mild tubulitis	n/a	n/a	normal	n/a	n/a	9.5	5.3	6			18	11.6	7.8	6.4
				DBD	n/a		A	W	low	neg	pos	no	n/a	n/a	n/a	n/a	n/a	128	37	106	45	110	43	98	49	87	56	n/a	n/a	n/a	n/a			ND	n/a	n/a	indication Bx 15/09/10		n/a	n/a	5.1	4.7	4.9	4.5	5.6	22.6	28.1	12.4	5
				DBD	n/a		A	W	low	pos	equiv	yes	1	n/a	n/a	n/a	n/a	113	42	95	51	83	59					n/a	n/a	n/a	n/a			161	insuff glomeruli	n/a	n/a	normal	at stg	diet	8.3	8	13			18.2	16.1	9.4	9.6
				living	unrelated		A	W	low	pos	pos	no	n/a	n/a	n/a	n/a	n/a	71	109.5	60	133	59	134.8	63	124.3			n/a	n/a	n/a	n/a			98	Inadequate	n/a	n/a	normal	n/a	n/a	4.7	5.9	4.4	4.8		15.5	13.8	6.4	6.7
				living	related		A	W	low		pos	no	n/a	n/a	n/a	n/a	n/a	131	52	121	57	115	60					n/a	n/a	n/a	n/a			98	inadequate	n/a	n/a		n/a	n/a	8.5	7.7	8.3			10.9	4.6	9.8	7.2
				living	unrelated		A	W	low	pos	pos	no	n/a	n/a	n/a	n/a	n/a	176	44	158	38	164	37	196	30			n/a	n/a	n/a	n/a			106	Inadequate	n/a	n/a	impaired	9	Glicazide	11.6	8.5	6.4	5.6		19.2	2.2	7.7	7.1
				living	related		A	W	low	pos	pos	no	n/a	n/a	n/a	n/a	n/a	122	43	88	63.8	90	61.8	92	59			n/a	n/a	n/a	n/a			77	Focal nodular hyalinosis	n/a	n/a	normal	n/a	n/a	5.2	5.7	4.3	5.9		20.8	14.1	9.3	3
				DBD	n/a		A	w	low	pos	neg	yes	1	n/a	n/a	n/a	n/a	94	75	107	65	98	71					n/a	n/a	n/a	n/a			262	borderline acute t cell mediated rejection	n/a	delayed due to no hospital beds	normal	n/a	n/a	none	5	none			9.8	28.7	12.4	7.7
				DBD	n/a		A	W	low	pos	neg	yes	1	n/a	n/a	n/a	n/a	133	47	121	53	114	57					73	Borderline					73	Borderline	n/a	n/a	normal	n/a	n/a	4.9	none	4.5			9.8	12.4	6.7	10.6
				DBD	n/a		A	W	low	pos	neg	no	28	n/a	n/a	n/a	n/a	214	29	293	20	177	36					22	borderline	n/a	n/a			127	acute tubular injury, no rejection	n/a	n/a		n/a	n/a	6.1	5.1	5.1			8.6	21.9	9.2	12.3
				DBD	n/a		A	w	low	pos	pos	no	n/a	n/a	n/a	n/a	n/a	175	25	161	27	164	27					n/a	n/a	n/a	n/a			147	inadequate vascular, NAD	n/a	had biopsy at day 41				5.8	7.2	6.3			10.3	8.4	6.8	7.8
				DCD	n/a		A	W	low	pos	neg	yes	1	n/a	n/a	n/a	n/a	173	34	254	22							118	borderline	233	1A, SV40			118	borderline	n/a	n/a				4.5	5.9				18.7	10.4	8.4	7.8
				DBD	n/a		A	w	low	pos	neg	yes	1	n/a	n/a	n/a	n/a	138	47	159	40	184	34					n/a	n/a	n/a	n/a			141	NAD	n/a	delay = previous empiric rx for rejection				5.8	4.6	5.4			<2.0	3.9	12.5	8.2
				DCD	n/a		A	W	low	neg	pos	no	n/a	n/a	n/a	n/a	n/a	146	40	151	39							n/a	n/a	n/a	n/a			184	NAD	n/a	delay - multiple bx for DGF				7.1	7.5				9.7	13.2	10	11.7
				living	unrelated		A	w	low	pos	pos	no	n/a	n/a	n/a	n/a	n/a	146	43	158	39	156	39					5	2A	n/a	n/a			ND	n/a	n/a	previous biopsies x2		30	gliclazide	7.8	10.5	11.2			21.4	10.5	10	6.9
				DBD	n/a		A	W	low	neg	pos	no	n/a	n/a	n/a	n/a	n/a	143	51	141	51							170	1A	na	na			93	normal	na	na	na	na	na	5.7	5.4	na	na	na	15.1	11.7	8.6	8.1
				DCD	n/a		A	W	low	neg	neg	no	n/a	n/a	n/a	n/a	n/a	149	49	164	44							132	1A	na	na			na	na	na	patient refused, poor compliance. Indicated bx on D47 normal.	na	na	na	4.3	4.9	na	na	na	11	12.8	9.1	na
				DBD	n/a		A	W	low	pos	pos	no	n/a	n/a	n/a	n/a	n/a	385	18	309	24							7	2A	na	na			not done	na	na	2 indicated biopsies on D24 and D69- mild to mod IFTA, vasculopathy, no rej	na	na	na	5.5	5.3	na	na	na	21.5	14.9	3.8	8.8
				living	unrelated		A	w	low	neg	neg	no	n/a	n/a	n/a	n/a	n/a	132	49	128	51	145	43	na	na	na	na	76	1A	n/a	n/a			not done	na	na	indicated Bx showing rej on 15/11/2011		na	na	4.7	5.3	6.9	5.4	na	15.1	12.5	9.5	6.7
				DCD	n/a		A	w	low	neg	pos	no	n/a	n/a	n/a	n/a	n/a	236	26	234	26	264	23					76	2A	n/a	n/a			not done	na	na	indicated biopsy on 4-9-2012 showed banff2a rej		na	na	6.3	4.5	5.2	na	na	9.9	6.9	4.6	7.5
				living	related		A	w	low	neg	neg	no	n/a	n/a	n/a	n/a	n/a	127	50	112	57	105	61.9	na	na	na	na	61	borderline	n/a	n/a			rej on 30-08-2011	n/a	na	indicated Bx-30-08-2011 showed borderline rej, treated on clinical grounds, 3/12 post rej Bx not done due to AVM in Tx kidney		na	na	5.1	4.4	4.6	3.7	na	22.5	16.8	8.1	8.6
				living	related		A	W	low	pos	neg	yes	1	n/a	n/a	n/a	n/a	157	40	145	43							91	1A	na	na			91	1A	na	na	na	na	na	6.2	4.8	na	na	na	10.3	2.8	12.3	8.3
				living	related		A	w	low	neg	neg	no	n/a	n/a	n/a	n/a	n/a	136	51	107	67.1	103	74					98	1A	n/a	n/a			98	1A	na	na		na	na	4.9	9.5	5.8	na	na	12.4	12.8	8	8.5
				DCD	n/a		A	w	low	neg	neg	no	n/a	n/a	n/a	n/a	n/a	67	106.4	66	108.3	66	106.1	na	na	na	na	85	1A	n/a	n/a			85	1A	na	na		na	na	5.7	4.8	5.8	5.1	na	14.5	24.3	10.4	8.1
				living	unrelated		A	w	low		pos	no	n/a	n/a	n/a	n/a	n/a	118	43	100	52	97	54					106	1A	n/a	n/a			106	1A	na	na		na	na	4.9	5.3	4.8	na	na	12.9	12.2	6.7	8.4
				living	related		A	W	low	pos	neg	yes	1	n/a	n/a	n/a	n/a	226	29	168	44	261	25	320	19	208	32	n/a	n/a	n/a	n/a			93	normal (clinically recurrent FSGS)	several biopsys indicated (e.g. rising Cr) but no rej seen	n/a		n/a	n/a	5.6	5.6	5	5.4	5.3	10.6	7.8	12.6	9.8
				living	unrelated		A	W	low	pos	pos	no	n/a	n/a	n/a	n/a	n/a	109	59	104	62.8	94	70.5	86	83			132	1B	n/a	n/a			133	normal	n/a	n/a	known DM	n/a	Glicazide	5.8	none	none	13.5		14.1	11.4	7.8	5.4
				DBD	n/a		A	W	low	pos	pos	no	n/a	n/a	n/a	n/a	n/a	109	68.9	122	60.1	110	67.3					168	1A	n/a	n/a			105	normal	n/a	n/a	normal	n/a	n/a	none	5.9	6.9			8.8	13.4	12.2	8.9
				DBD	n/a		A	W	low		pos	no	n/a	n/a	n/a	n/a	n/a	212	29	246	25	228	27	248	24			n/a	clinical	n/a	n/a			89	normal	n/a	n/a		n/a	n/a	4.8	4.5	5.5	5.1		15.8	15.2	15.8	6.7
				living	related		A	W	low	pos	pos	no	n/a	n/a	n/a	n/a	n/a	83	63	75	71							n/a	n/a	n/a	n/a			187	normal	n/a	n/a	normal	n/a	n/a	none	6.2				32	7.4	8.9	8.9
				living	unrelated		A	W	low	neg	pos	no	n/a	n/a	n/a	n/a	n/a	96	53	88	58							n/a	n/a	n/a	n/a			93	normal	n/a	n/a	normal	n/a	n/a	5.2	none				20.6	23.5	7.2	6.4
				DBD	n/a		A	W	low	neg	neg	no	n/a	n/a	n/a	n/a	n/a	140	66	146	62.4							102	borderline	na	na			82	NAD	n/a			n/a	n/a	4.6	4.6				11.1	5.3	4.9	10.9
				DBD	n/a		A	W	low	pos	neg	yes	1	n/a	n/a	n/a	n/a	151	45	136	50	145	47	149	45	139	48	n/a	n/a	n/a	n/a			ND	n/a	n/a	bx day 64, protocol bx not performed as pt requires a gen anastetic	normal	n/a	n/a	none	none	none	5	5.4	13.3	17.4	10.5	6.9
				DBD	n/a		A	W	low	neg	pos	no	n/a	n/a	n/a	n/a	n/a	96	69.8	82	83.4	78	94					n/a	n/a	n/a	n/a			awaiting	n/a	n/a	u/snd sept first	normal	n/a	n/a	5.7	none	5.3			14.4	15.1		5.3
				DBD	n/a		A	w	low	pos	neg	yes	1	n/a	n/a	n/a	n/a	182	32	135	45							n/a	n/a	n/a	n/a			n/a	n/a	n/a	AF-cardioversion and warfarin post txp	none	n/a	n/a	5.3	5.4	none			15.2	8.9	9.5	7.5
				DBD	n/a		A	W	low		pos	no	n/a	n/a	n/a	n/a	n/a	86	87	92	81							n/a	n/a	n/a	n/a			awaiting	n/a	n/a	n/a	not done	n/a	n/a	4.7	3.3				14	10.8	9.5	5.4
				living	related		A	W	low	pos	pos	no	n/a	n/a	n/a	n/a	n/a	113	57.6	96	68.4	129	49.2	105	63.6			n/a	n/a	n/a	n/a			85	mild focal acute tubular injury	n/a	n/a	none	n/a	n/a	5.7		8.9	7.1		4.2	11	9.3	5.8
				DBD	n/a		A	W	low		pos	no	n/a	n/a	n/a	n/a	n/a	452	13	434	15	422	12	408	13			12	3	n/a	n/a			77	Inadequate	n/a	n/a	DM	n/a	n/a	10.9	7.2	11.1	13.5		18.7	8.8	11.7	7.2
				DBD	n/a		RIP	W	low	?	pos	no	n/a	2013-05-19	cancer	n/a	n/a	120	52	103	61.4	105	60.1	98	69			94	1B	n/a	n/a			94	1B	n/a	n/a	not done	24	Glicazide	4.9	none	3.4	6.2		20.1	13.1	9.3	6.7
				living	related		RIP	W	low	pos	pos	no	n/a	2013-09-25	n/a	n/a	n/a	152	28	117	42	110	45					160	1A	n/a	n/a			160	1A	n/a	n/a	known diabetic	n/a	insulin	none	none	none			17.7	11.1	5.7	9.4
				living	unrelated		A	W	low	neg	neg	no	n/a	n/a	n/a	n/a	n/a	123	40	126	39	115	44	129	40			n/a	n/a	n/a	n/a			159	normal	n/a	n/a	normal	n/a	n/a	none	5.3	none	5.3		11	11.1	7.9	6.8
				DBD	n/a		A	w	low	pos	neg	yes	1	n/a	n/a	n/a	n/a	192	30	182	32	186	31					n/a	generalised tubular injury focal area intense tubulitis	n/a	n/a			66	generalised tubular injury focal area intense tubulitis	n/a	n/a	normal	n/a	n/a	6	4	5.1			20.6	5.9	9.4	6.9
				DBD	n/a		A	w	low		pos	no	n/a	n/a	n/a	n/a	n/a	214	27	160	38	STG	STG					n/a	n/a	n/a	n/a			91	polyoma virus	n/a	n/a				7.3	5.2				10.6	15.1	11.4	13.6
				DBD	n/a		A	W	low	neg	neg	no	n/a	n/a	n/a	n/a	n/a	245	23	198	30							n/a	n/a	n/a	n/a			174	NAD	n/a	delay = reimplantation ureter, biopsy day 41				5.9	5				12.8	11.2	8	3.4
				DCD	n/a		A	W	low		pos	no	n/a	n/a	n/a	n/a	n/a	243	23	246	23							95	2A	158	borderline			95	2A	n/a	n/a				7	5.8				17.6	13.3	10.1	6.5
				living	related		A	w	low	neg	neg	no	n/a	n/a	n/a	n/a	n/a	113	51	107	54	110	52	na	na	na	na	n/a	n/a	n/a	n/a			98	ormal by light microscopy and immunos but EM showed extensive foot process fusion				na	na	4.8	4.5	4.2	na	na	8.9	13.7	7.5	8.3
				DBD	n/a		A	w	low	pos	neg	yes	1	n/a	n/a	n/a	n/a	208	28	203	29							n/a	n/a	n/a	n/a			na	not done	na	2 Indicated bx D25 and D60-no rej, mild IFTA	na	na	na	8.4	6.7	4.1	na	na	4.9	9.8	10.4	6.2
				DBD	n/a		A	W	low		pos	no	n/a	n/a	n/a	n/a	n/a	498	8	233	19							n/a	n/a	n/a	n/a			na	not done	na	indicated bx D22-pyelonephritis. Rec UTIs, candidauria, lifethreatening pulm edema around the time of protocol Bx	na	na	na	6.6	5.7	na	na	na	19.2	19.9	7.4	5.6
				DBD	n/a		A	W	low		pos	no	n/a	n/a	n/a	n/a	n/a	119	43	104	51							n/a	n/a	n/a	n/a			123	normal, <10% lymhocytic infiltration	na	na	na	na	na	5.6	4.9	na	na	na	19.7	10.6	9.2	7.8
				DCD	n/a		A	w	low		pos	No	n/a	n/a	n/a	n/a	n/a	148	42	134	47	131	41	131	48	133	47	n/a	n/a	n/a	n/a			75	normal	na	na	IGT	N/A	N/A	5.5	5.2	6.8	5.3	na	32	11.6	8.8	5.2
				DBD	n/a		A	w	low	neg	neg	no	n/a	n/a	n/a	n/a	n/a	108	49	118	44	123	42					n/a	n/a	n/a	n/a			98	normal	na	na		na	na	5.2	6.2	5.7	na	na	8.9	10.1	9.2	6.8
				DBD	n/a		A	w	low	pos	neg	yes	1	n/a	n/a	n/a	n/a	136	46	126	50	153	40					n/a	n/a	n/a	n/a			108	normal	na	na		diabetic pre tx	na	3.3	na	na	na	na	17.5	10.6	7	6.3
				DBD	n/a		A	W	low	pos	pos	no	n/a	n/a	n/a	n/a	n/a	125	37	119	40							n/a	n/a	n/a	n/a			na	na	na	refused- anxiety, mental health issues	na	na	na	5.3	5.6	na	na	na	11.1	13.3	8.3	9.4
				living	related		A	w	low	pos	pos	no	n/a	n/a	n/a	n/a	n/a	136	46	120	54	113	57	na	na	na	na	n/a	n/a	n/a	n/a			not done	na	large infected haematoma			na	na	6.6	5.8	8.3	na	na	23.1	6.7	11.4	10.4
				DCD	n/a		A	w	low	neg	pos	no	n/a	n/a	n/a	n/a	n/a	243	30	222	33.6	194	38.4					n/a	n/a	n/a	n/a			not done	na	na	indicated Bx on 7-9-2012, ATN		na	na	5.2	5.5	na	na	na	12.9	8.6	9.2	8.5
				DBD	n/a		A	w	low		pos	no	n/a	n/a	n/a	n/a	n/a	195	24	291	15	161	30	na	na	na	na	n/a	n/a	n/a	n/a			not done	na	na	Bx done on 22/05/2012, which was few weeks after treatment for presumed rej		na	na	5.5	6.2	5.6	na		10.5	7.6	10	9.2
				DBD	n/a		A	w	low	pos	Neg	yes	1	n/a	n/a	n/a	n/a	108	65.7	96	75.2	168	40	na	na	na	na	n/a	n/a	n/a	n/a			ND	na	na	TIA, on dual antiplatelet therapy		N/A	N/A	6	5.7	5.6	na	na	11.2	11.6	8.5	10.1
				DCD	n/a		A	w	low	neg	neg	no	n/a	n/a	n/a	n/a	n/a	549	9	286	19	361	15					36	borderline	na	na			84	moderate IFTA, bordeline rej	na	na		na	na	6.3	5.9	na	na	na	31.6	19.5	9.9	3.4
				living	unrelated		A	W	low	pos	pos	no	n/a	n/a	n/a	n/a	n/a	98	52	102	49	90	57					7	borderline	na	na			98	minor tubulitis, not amounting to rej-normal		na		na	na	5.1	4.6	6.1	na	na	24.7	9.1	8.2	6.4
				living - altruistic	unrelated		A	W	low	pos	neg	yes	1	n/a	n/a	n/a	n/a	65	77.5	67	74.6	71	69.8	74	66.4			n/a	n/a	n/a	n/a			107	normal	n/a	n/a	normal	n/a	n/a	5.6	4.3	5.8	8.8		17.1	9.5	8.6	5.2
				DCD	n/a		A	W	low	pos	pos	no	n/a	n/a	n/a	n/a	n/a	173	36	149	43	158	40	151	42			n/a	n/a	n/a	n/a			102	normal	n/a	n/a		n/a	n/a	5.3	4.7	4.5	5.5		9.5	7.4	11.6	6.7
				living	related		A	w	low	neg	neg	no	n/a	n/a	n/a	n/a	n/a	98	71	85	71							n/a	n/a	n/a	n/a			127	normal	n/a	n/a	IGT	at STG	Glicazide	4.2	none				26.5	13.5	11.2	7.5
				DCD	n/a		A	W	low	neg	neg	no	n/a	n/a	n/a	n/a	n/a	329	13	238	18							n/a	n/a	n/a	n/a			136	no rejection, full report awaited	n/a	n/a	normal	n/a	n/a	5.9	none				11.3	12.3	7	8.1
				living	related		A	W	low	pos	pos	no	n/a	n/a	n/a	n/a	n/a	103	57	111	52	117	49	109	53	102	56	n/a	In/adequate but suspicious	n/a	n/a			ND	n/a	n/a	indication Bx 01/10/10	normal	n/a	n/a	none	none	5.3	5.4	4.8	7.3	7.7	8.1	9.8
				DBD	n/a		A	W	low	pos	neg	no	23	n/a	n/a	n/a	n/a	153	41	127	50	123	52	104	67			n/a	n/a	n/a	n/a			ND	n/a	n/a	pyelovesicostony 02/02	normal	n/a	n/a	6.9	6.3	5.3	6.8		3.9	8.2	7	9
				living - altruistic	unrelated		A	W	low		pos	no	n/a	n/a	n/a	n/a	n/a	108	64.4	93	76.6	90	79.1	96	72.8	88	86	n/a	n/a	n/a	n/a			ND	n/a	n/a	pt refused indication Bx on d44	normal	n/a	n/a	5.2	5.1	5	4.6	5.3	21.6	10.7	6.5	5.4
				living	unrelated		A	W	low	pos	neg	yes	1	n/a	n/a	n/a	n/a	122	42	113	46	122	42					5	1A	n/a	n/a			ND	n/a	n/a	MMF intolerant	normal	n/a	n/a	none	6.5	5.3			8.6	5.6	8.7	6
				DBD	n/a		A	w	low	pos	pos	no	n/a	n/a	n/a	n/a	n/a	113	44	90	57							n/a	n/a	n/a	n/a			n/a	n/a	n/a	WCC dropped-medication changes / pt cancelled	normal	n/a	n/a	5.3	6.5	none			10.9	7.9	7.5	7
				DBD	n/a		A	w	low	pos	neg	yes	1	n/a	n/a	n/a	n/a	220	26	214	26	185	31					n/a	n/a	n/a	n/a			56	localised scarring	n/a	n/a	normal	n/a	n/a	4.8	none	none			29.7	5.1	9.3	8.6
				DCD	n/a		A	w	low	neg	neg	no	n/a	n/a	n/a	n/a	n/a	211	30	223	28	203	31					8	borderline					191	focal tubular calcification	n/a	delayed due to rejection day 8	IGT	n/a	n/a	6.2	6.1	3.8			14.9	12.3	7.6	6.1
				living - paired	unrelated		A	W	low	?	pos	no	n/a	n/a	n/a	n/a	n/a	100	48	107	44	102	46					n/a	n/a	n/a	n/a			145	Borderline	n/a	delay due to low wcc	normal	n/a	n/a	none	none	6.5			9.2	10.4	10.7	10.1
				living	related		A	w	low	neg	neg	no	n/a	n/a	n/a	n/a	n/a	188	36	185	36	630	9					n/a	n/a	n/a	n/a			91	NAD	n/a	n/a				5.6	5.4	5			17	8.1	7.9	9.9
				DCD	n/a		A	W	low		pos	no	n/a	n/a	n/a	n/a	n/a	286	19	391	13							103	1A	n/a	n/a			103	1A	n/a	n/a				6.6	9.1				13.8	14.5	9	5.4
				living - paired	unrelated		A	W	low	neg	neg	no	n/a	n/a	n/a	n/a	n/a	138	34	121	40							13	borderline	n/a	n/a			91	NAD	n/a	n/a		15	gliclazide, metformin	5	6.8				17.2	12.2	9.3	5.6
				living	unrelated		A	W	low	neg	pos	no	n/a	n/a	n/a	n/a	n/a	64	81.6	86	57							n/a	n/a	n/a	n/a			92	NAD	n/a	n/a				6.3	5.2				6.5	5.6	12.4
				living	unrelated		A	W	low	pos	pos	no	n/a	n/a	n/a	n/a	n/a	121	55									n/a	n/a	n/a	n/a			99	nad	n/a	n/a				5.3					17.4	11.7	11.5
				living	related		A	W	low	pos	neg	yes	1	n/a	n/a	n/a	n/a	118	57	102	68.5	143	45					12	1A	239	Banff 1b	435	1A	92	normal	n/a	n/a		n/a	n/a	5.4	4.4	5.2			15.7	10	6.3	6.6
				DBD	n/a		A	W	low	pos	pos	no	n/a	n/a	n/a	n/a	n/a	212	27	188	31	201	28	177	33			n/a	n/a	n/a	n/a			92	normal	Bleed from mesenteric artery, small bowel mucosa on histology	n/a	DM	n/a	n/a	19.7	8.8	10.8	13.5		14.6	10.9	7.8	5.6
				living	unrelated		A	W	low	neg	pos	no	n/a	n/a	n/a	n/a	n/a	100	49	89	56	84	60					n/a	n/a	n/a	n/a			99	normal	n/a	n/a		n/a	n/a	5.6	4	4.6			5	9.9	11	7.2
				DBD	n/a		A	W	low		pos	no	n/a	n/a	n/a	n/a	n/a	169	36	144	43	145	43					13	2A	35	borderline			147	borderline	n/a	n/a				6.2	4.9	5.6			14.5	27.9	9	8.5
				living - altruistic	unrelated		A	W	low	pos	neg	yes	1	n/a	n/a	n/a	n/a	160	38	128	49	128	49	157	38			45	borderline	160	2A			160	2A	n/a	n/a	normal	n/a	n/a	5.4	5.8	4.4	6.2		22	12.4	11.4	12.7
				living	related		A	w	low	neg	pos	no	n/a	n/a	n/a	n/a	n/a	165	41	138	50	119	59					5	borderline	155	borderline			70	inadequate	n/a	done early as early rejection				5.6	3.9	2.6			8.4	6.6	9	11.1
				DBD	n/a		A	w	low	pos	neg	yes	1	n/a	n/a	n/a	n/a	96	89									93	borderline	n/a	n/a			93	borderline						4.5					19.2	9	11.7
				DBD	n/a		A	w	low	neg	pos	no	n/a	n/a	n/a	n/a	n/a	181	39.6									n/a	n/a	n/a	n/a										6.3					15.1	8.6	7.8
				DCD	n/a		A	w	low	neg	neg	no	n/a	n/a	n/a	n/a	n/a	150	32									n/a	n/a	n/a	n/a			123	result awaited	n/a	n/a	normal	n/a	n/a	5.3					11	15.2	11.9
				DBD	n/a		A	F	low		pos	no	n/a	n/a	n/a	2012-10-30	renal vein thrombosis	n/a	n/a	n/a	n/a	n/a	n/a	n/a	n/a	n/a	n/a	n/a	n/a	n/a	n/a			n/a	n/a	n/a	n/a	n/a
				DBD	n/a		A	W	low		pos	no	n/a	n/a	n/a	n/a	n/a	208	36	195	38.4							31	borderline												4.9	5.1				20.5	8.5	7.6	11.5
				DCD	n/a		A	F	low			no	n/a	n/a	n/a	2013-08-07	primary none function, removed due to sepsis	n/a	n/a	n/a	n/a							n/a	n/a	n/a	n/a			na												32	17.3	13.5
				living	related		A	w	low	neg	neg	no	n/a	n/a	n/a	n/a	n/a	151	32									n/a	n/a	n/a	n/a										5.8					14.9	5.7	12.1
				DBD	n/a		A	W	low		pos	no	n/a	n/a	n/a	n/a	n/a	129	66.1									n/a	n/a	n/a	n/a			116		nil	n/a				6.2					9.4	11.8	10.7
				DBD	n/a		A	Tx nephrectomy immediate post Tx due to renal artery dissection and infarction	low	neg	neg	no	n/a	n/a	n/a	Immediate	dissection of artery and infarct											n/a	n/a	n/a	n/a
				DBD	n/a		A	f	low	neg	neg	no	n/a	n/a	n/a	2012-03-15	hematoma and transplant artery thrombus											n/a	n/a	n/a	n/a
				DCD	n/a		A	Tx nephrectomy	low	neg	neg	no	n/a	n/a	n/a	2012-05-01	ren/al vein thrombosis											n/a	n/a	n/a	n/a
				DBD	n/a		A	REMOVED day 2 due to thrombosed vein	low	pos	neg	yes	1	n/a	n/a	2012-05-16	parenchymal tear, haematoma, no perfusion											n/a	n/a	n/a	n/a
				DCD	n/a		A	Nephrectomy day 2 post-tx	low	neg	pos	no	n/a	n/a	n/a	2010-12-20	ren/al vein thrombosis											n/a	n/a	n/a	n/a
				living	unrelated		A	w	high	pos	neg	yes	1	n/a	n/a	n/a	n/a	153	31	156	31	153	31	na	na	na	na	56	borderline	n/a	n/a			not done	n/a	na	indicated Bx on 4-8-2011		na	na	9.9	7.1	6.7	na	na	18.6	10.8	6.4	6.3
				DBD	n/a		A	w	high	pos	pos	No	n/a	n/a	n/a	n/a	n/a	91	59	92	58	93	57	na	na	na	na	708	1A	n/a	n/a			not done	na	na	Clinically indicated biopsy 20/4/11 - NAD, on warfarin-protocol Bx not done		na	na	4.6	4.6	4.4	4.1	na	4.6	10	10.4	Cy A 204
				DBD	n/a		RIP	RIP	high	Data not available	pos	no	n/a	2012-07-03	multi organ failure from sepsis due to e.coli	n/a	n/a	87	56	78	63.5	88	55	n/a	n/a	n/a		n/a	n/a	n/a	n/a			ND	n/a	n/a	switch to sirolimus, to wait re: biopsy	normal	n/a	n/a	5	5.5	none			19.2	12.3	n/a	n/a
				DBD	n/a		A	W	high		pos	no	n/a	n/a	n/a	n/a	n/a	96	69.3	114	56.8	91	73.5					n/a	n/a	n/a	n/a			97	normal, weak c4d	n/a	n/a	DM	n/a	n/a	6.1	16.6	6.6			19.7	13.7	11	8.3
				DBD	n/a		A	W	high	pos	pos	no	n/a	n/a	n/a	n/a	n/a	164	28	112	43							n/a	n/a	n/a	n/a			92	n/a	n/a	n/a		26	glic	10.1	10.3				24.5	8	11	n/a
				living - paired	unrelated		A	W	high	neg	neg	no	n/a	n/a	n/a	n/a	n/a	122	51	114	55	94	69.4					n/a	n/a	n/a	n/a			ND	n/a	n/a	on warfarin		diabetes	n/a	8.8	11.9	8			7.9	12.2	9.2	sirolimus
				DBD	n/a		A	w	high	pos	pos	no	n/a	n/a	n/a	n/a	n/a	104	54	88	65	90	62.9	na	na	na	na	n/a	n/a	n/a	n/a			not done	not done	na	epstein syndrome, megalothrombocytopathy, bleeding risk		na	na	4	4.2	4.2	na	na	10.3	17.1	5.9	10.5
				DBD	n/a		A	w	high		pos	no	n/a	n/a	n/a	n/a	n/a	232	24	194	30	171	34	na	na	na	na	n/a	n/a	n/a	n/a			80	BK nephropathy	nil	na		13	gliclazide	13.8	6.3	7.4	8.2	na	12.3	8.3	6.8	3.9
				living	related		A	w	high	pos	pos	no	n/a	n/a	n/a	n/a	n/a	103	47	100	49	94	52	na	na	na	na	no	n/a	n/a	n/a			104	normal	none	na	normal	na	na	3.8	4.7	5.4	6.1	na	11.1	10.2	10.5	7.8
				DCD	n/a		A	W	high	neg	neg	no	n/a	n/a	n/a	n/a	n/a	120	63	99	78.1	87	90.6	na	na	na	na	n/a	n/a	n/a	n/a			51	normal	nil	early clinically indicated biopsy performed which was normal				4.7	3	4.9	5.3	na	24.2	13.5	8.5	7.6
				living	related		A	w	high	pos	neg	yes	1	n/a	n/a	n/a	n/a	127	56	113	63	127	55	146	47	na	na	n/a	n/a	n/a	n/a			not done	na	na	patient choice		N/A	N/A	6	6.1	5.6	5.7	na	11	7.3	9.2	9.8
				DBD	n/a		A	w	high		pos	no	n/a	n/a	n/a	n/a	n/a	137	57.6	125	66	121	68.4	132	61.2	na	na	n/a	nn/a	n/a	n/a			not done	na	na	bladder outlet obstruction, peritransplant collection, UTIs, decided not to do protocol Bx		NA	N/A	at SGH	4.8	4.6	4.5	na	12.6	13.1	9.8	6
				living	unrelated		A	w	high	Neg	Neg	No	n/a	n/a	n/a	n/a	n/a	85	79.7	81	84.3	77	89.1	95	69.7	na	na	n/a	n/a	n/a	n/a			ND	na	na	SOB, attack of asthma that lsted on and off for a while around the time of planned protocol Bx. Decided not to do it.		N/A	N/A	4.6	5.3	5.4	5.4	na	10.9	11.1	10.3	12.2
				living	unrelated		A	w	high		pos	no	n/a	n/a	n/a	n/a	n/a	130	51	104	64.8	98	69.4	111	59.9	na	na	n/a	n/a	n/a	n/a			146	Borderline	nil	na	IGT	12	metformin	8.9	8.2	11.2	17.1	na	9.5	13.7	9.9	6.7
				DBD	n/a		A	w	high	neg	pos	no	n/a	n/a	n/a	n/a	n/a	55	101.1	51	110.3	60	97					n/a	n/a	n/a	n/a			not done	na	na	cellulitis, wound infection		10	gliclazide and insulin	5.4	7.2	3.3	na		32	13.4	9.3	11.3
				living	related		A	W	high	pos	neg	yes	1	n/a	n/a	n/a	n/a	113	63.3	102	71.3	108	66.4	104	69			n/a	n/a	n/a	n/a			141	normal	n/a	n/a		n/a	n/a	6.3	4.4	5.8	6.3		11.7	8.8	10.2	5
				living	unrelated		A	W	high	neg	neg	no	n/a	n/a	n/a	n/a	n/a	83	61	74	69.7	69	75.3	65	90.4	67	77.4	n/a	n/a	n/a	n/a			84	normal	n/a	n/a	impaired	n/a	n/a	3.6	3.4	3	5.4	5.1	17.1	9.6	9.3	8.8
				living	unrelated		A	w	high	neg	pos	no	n/a	n/a	n/a	n/a	n/a	72	78.2	73	76.6	67	90					85	borderline	n/a	n/a			85	borderline	n/a	n/a				5.5	4.9	4			18	14.9	7.8	4.3
				DBD	n/a		A	w	high	pos	pos	no	n/a	n/a	n/a	n/a	n/a	96	54	89	59	76	75					n/a	n/a	n/a	n/a			not done	na	na	recurent UTIs		diabetix pre-Tx	na	3.8	7.3				10.5	7.2	9.3	6.6
				living	related		A	W	high		pos	no	n/a	n/a	n/a	n/a	n/a	143	35	145	34	112	46	129	39			n/a	n/a	n/a	n/a			110	normal	n/a	n/a		n/a	n/a	4.4	5.4	4.2	4.8		12.2	7.4	8	6.1
				living - paired	unrelated		A	W	high	pos	neg	no	n/a	n/a	n/a	n/a	n/a	83	63.6	86	60.8	81	65.2					n/a	n/a	n/a	n/a			120	normal	n/a	n/a				5	5.4	4.4			14.7	15.2	8.8	5.9
				DBD	n/a		A	W	high		pos	no	n/a	n/a	n/a	n/a	n/a	187	25	142	34	133	37	124	40			n/a	n/a	n/a	n/a			85	normal	n/a	n/a	normal	n/a	n/a	4	3.6	3.6	4.5		18.8	14.4	6.6	7.8
				DBD	n/a		A	W	high	pos	pos	no	n/a	n/a	n/a	n/a	n/a	130	50	125	50	112	56	115	54			102	borderline	n/a	n/a			102	borderline	n/a	n/a	DM	n/a	n/a	3.9	7.6	6.7	10.7		10	11.1	6.1	6.6
				DBD	n/a		A	W	high	pos	pos	no	n/a	n/a	n/a	n/a	n/a	153	47	165	43	160	44	148	48			78	borderline	127	1A			ND	n/a	n/a	Recent indication biopsy	normal	n/a	n/a	6.7	5.4	5.8	6		20	12.4	9.1	7.6
				DBD	n/a		A	W	high	neg	pos	no	n/a	n/a	n/a	n/a	n/a	127	48	91	72.1							51	borderline	n/a	n/a			108	NAD	n/a	n/a		71	glic	9.8	5.3				32	17	8.1	6
				DCD	n/a		A	W	high		pos	no	n/a	n/a	n/a	n/a	n/a	198	28	140	42							168	1A	n/a	n/a			168	1A	n/a	delay as bx in Feb				7.1	5.9				12	17.3	19.2	<2.0
				DBD	n/a		A	W	high	pos	neg	yes	1	n/a	n/a	n/a	n/a	90	58	109	47							n/a	n/a	n/a	n/a			83	?glomerulitis	n/a	n/a				6.5	6				14.4	18.5	13.6	11.7
				living	unrelated		A	w	high	pos	Neg	yes	1	n/a	n/a	n/a	n/a	136	46	143	44	133	47	117	54	117	54	54	2A	137 (25-01-2011)	Borderline			ND	na	na	rejection 2 month post tx		N/A	N/A	4.5	4.1	4.6	5.5	na	12.1	14.8	10	3.7
				living - altruistic	unrelated		A	w	high	pos	pos	no	n/a	n/a	n/a	n/a	n/a	109	46	117	43	131	37					127	1A	n/a	n/a			not done	na	na	obese, collection		90	metformin	5.6	5.3	8	na		12.5	8.2	8.4	8.1
				living	unrelated		A	w	high	pos	neg	yes	1	n/a	n/a	n/a	n/a	88	59.5	91	58	80	70					63	1A	n/a	n/a			not done	na	na	rejection episode on 02/05/2012, 3/12 post rej Bx done on 24/08/2012-normal		na	na	7.6	6.2	6.8	na	na	7.2	19.6	10.1	7.6
				DBD	n/a		A	w	high	pos	pos	no	n/a	n/a	n/a	n/a	n/a	93	54	95	53	106	46					69	1A	154	Banff 1a			not done	n	na	2 rejection episodes		diabetic pre Tx	gliclazide pre Tx, insulin post						18.5	8.2	5.5	9.9
				living	related		A	w	high	pos	Neg	yes	1	n/a	n/a	n/a	n/a	151	52	137	59	136	58	162	47	170	44	109	1A	235 (20-04-2011)	Banff 1B			109	1A	na	na	IGT	N/A	N/A	6	6.2	4.8	5.5	5.8	10.5	12.9	10.8	9.9
				DBD	n/a		A	W	high	pos	pos	no	n/a	n/a	n/a	n/a	n/a	152	32	145	34	125	40					n/a	n/a	na	na			95	<10% interstitial infiltrates, occal tubulitis not amounting to borderline, glomerulitits unexplained. No C4D	na	na	na	na	na	6.1	5.1	4.9	na	na	21.3	7.8	8.7	8.6
				living	related		A	W	high	neg	pos	yes	1	n/a	n/a	n/a	n/a	89	69.4	83	75.3	93	69	94	67			n/a	n/a	n/a	n/a			154	normal	n/a	n/a	normal	n/a	n/a	4.9	none	5.1	none		8.8	10.4	6.5	6.4
				living	unrelated		A	W	high	pos	neg	yes	1	n/a	n/a	n/a	n/a	122	55	118	58.4	99	71.2	96	73.5			56	borderline	n/a	n/a			197	normal	n/a	n/a	normal	n/a	n/a	4.5	6	4.9	4.7		18.6	9.7	7.2	8
				DBD	n/a		A	W	high		neg	no	n/a	n/a	n/a	n/a	n/a	98	58	84	70	81	73	87	66.8			n/a	n/a	n/a	n/a			98	normal	n/a	n/a	normal	n/a	n/a	4.4	3.7	3.6	4.4		10.3	12.6	9.2	5.3
				living	unrelated		A	W	high	pos	pos	yes	1	n/a	n/a	n/a	n/a	103	66	94	73.1	95	72.2	107	62.7			n/a	n/a	n/a	n/a			98	normal	n/a	n/a	normal	n/a	n/a	4.2	4.7	3.7	4.5		11.2	15.6	20.6	8.8
				living	unrelated		A	w	high	pos	pos	no	n/a	n/a	n/a	n/a	n/a	109	76	118	56							n/a	n/a	n/a	n/a			114	normal	n/a	n/a	IGT	9	diet + glic	10.4	13.7				6.5	7.8	12.4	5.9
				DCD	n/a		A	W	high	? pos	neg	yes	1	n/a	n/a	n/a	n/a	106	46	60	89.1	58	92.3	67	77.9	56	101	n/a	n/a	n/a	n/a			ND	n/a	n/a	BP too high, still treating BP	known DM	n/a	converted to insulin	n/a	n/a	n/a	none	6.9	24.7	13.4	8.4	6
				DBD	n/a		A	W	high	?pos	neg	started23/04	14	n/a	n/a	n/a	n/a	176	34	171	35	156	41					n/a	no bx, cr^ MP given	n/a	n/a			ND	n/a	n/a	warfarin/haematoma	normal	n/a	n/a	6.7	none	5.4			6.9	14.8	10	7.6
				DBD	n/a		A	W	high	pos	pos	no	n/a	n/a	n/a	n/a	n/a	131	35	111	43							n/a	n/a	n/a	n/a			119	Mild IFTA	n/a	n/a		n/a	n/a	6.9	5.4				21.5	6.4	12.6	10.9
				DBD	n/a		A	W	high	pod	pos	no	n/a	n/a	n/a	n/a	n/a	196	32	260	23	188	33					n/a	ATN	n/a	n/a			75	Focal coarse calcification	n/a	n/a	pre steriod induced diabetes	n/a	n/a	none	none	6.3			14.4	12.7	8.5	5.6
				DBD	n/a		A	w	high	neg	neg	no	n/a	n/a	n/a	n/a	n/a	169	36	139	45							n/a	n/a	n/a	n/a			95	BKVN	na	na	na	na	na	5.7	5.4	na	na	na	17.8	12.2	7	5.6
				living	unrelated		A	w	high	pos	pos	no	n/a	n/a	n/a	n/a	n/a	137	35	98	51	127	38					n/a	n/a	na	na			86	some chronic vascular changes, otherwise normal	na	na		42	gliclazide	9	6.2	na	na	na	14.8	10	6.3	4.8
				living	related		A	w	high	pos	neg	yes	1	n/a	n/a	n/a	n/a	92	73	105	62.7	98	67.7	na	na	na	na	n/a	n/a	n/a	n/a			not done	not done	na	lymphocele		na	na	5.8	6.1	4.9	na	na	13	12	11.4	6.9
				living	unrelated		A	W	high	neg	neg	no	n/a	n/a	n/a	n/a	n/a	154	40	152	41	130	49	141	45	134	47	n/a	n/a	n/a	n/a			ND	not done	na	recurrent large lymphocoele treated with betadine sclerotherapy, bladder neck surgery, UTIs and sepsis		na	na	5.5	5.5	6.2	5.3	6.2	7.7	7.3	8.8	7.2
				DBD	n/a		A	W	high	neg	neg	no	n/a	n/a	n/a	n/a	n/a	113	65	100	75							n/a	n/a	na	na			97	normal	na	na	na	na	na	4.5	5.5	na	na	na	30.2	14.3	10.3	8.1
				living	related		A	W	high	neg	neg	no	n/a	n/a	n/a	n/a	n/a	123	47	137	42							n/a	n/a	n/a	n/a			90	normal	na	na	na	na	na	3.9	4.3	na	na	na	9.9	11.8	6.1	8
				living	related		A	w	high	neg	pos	no	n/a	n/a	n/a	n/a	n/a	126	54	126	53	139	47	na	na	na	na	4	2A	n/a	n/a			89	normal	na	na		na	na	5.8	6.7	5.6	na	na	8.9	8.7	9	8.4
				living	related		A	w	high	pos	neg	yes	1	n/a	n/a	n/a	n/a	130	58	135	55	125	60					n/a	n/a	na	na			97	normal	na	na		na	na	5.4	6.1	5.7	na	na	14.7	15.5	11.7	10.4
				DBD	n/a		A	w	high	pos	pos	no	n/a	n/a	n/a	n/a	n/a	86	56	56	94.2	73	69.2	na	na	na	na	n/a	n/a	n/a	n/a			99	normal	na	na		na	na	5.1	4.2	3.8	na	na	12.6	12.9	9.6	10.3
				living	related		A	w	high	neg	neg	no	n/a	n/a	n/a	n/a	n/a	122	53	108	60.5	107	60.9	na	na	na	na	n/a	n/a	n/a	n/a			90	normal	na	na		na	na	5.8	6	5.7	4.2	na	19.6	11.3	10.5	7
				living - paired	unrelated		A	w	high	neg	neg	no	n/a	n/a	n/a	n/a	n/a	100	54	106	50	115	46					n/a	n/a	n/a	n/a			98	normal	na	na		na	na	5	3.9				3.5	4.7	8.2	6.1
				living	related		A	w	High	pos	neg	yes	1	n/a	n/a	n/a	n/a	98	64	86	74	87	73					n/a	n/a	n/a	n/a			90	normal	na	na		na	na	4.7	na	na	na	na	3.8	4.6	8.1	5
				DBD	n/a		A	W	high	neg	pos	no	n/a	n/a	n/a	n/a	n/a	129	37	115	42							n/a	n/a	n/a	n/a			na	na	na	not done due to lymphoce requiring drainage and betadine sclerotherapy.	na	na	na	5.6	6.3	na	na	na	19.6	10.4	11.1	8.6
				living - altruistic	unrelated		A	W	high		pos	no	n/a	n/a	n/a	n/a	n/a	123	51	115	56							n/a	n/a	n/a	n/a			na	na	na	refused	na	na	na	3.3	4.8	na	na	na			9.4	7
				DBD	n/a		A	W	high	pos	neg	yes	1	n/a	n/a	n/a	n/a	158	40	211	29							n/a	n/a	na	na			not done	na	na	shingles around the time of protocol bx, MMF stopped	na	na	na	7.3	6.6	na	na	na	25.9	17.8	7.7	6.8
				DBD	n/a		A	w	high	neg	pos	no	n/a	n/a	n/a	n/a	n/a	119	67.2	134	58.8	152	50.4					n/a	n/a	n/a	n/a			not done	na	na	recurrent UTIs, indwelling catheter, wound infection		na	na	3.4	5.6	5.5	na	na	32	32	9.6	6.5
				DBD	n/a		A	w	high		pos	no	n/a	n/a	n/a	n/a	n/a	214	29	150	43	152	42					n/a	n/a	n/a	n/a			not done	na	na	indicated bx D60 was normal, recurrent uTIs		na	na	6.8	6.3	5.4	na	na	32	19.7	8.9	7.6
				living	related		A	w	high	neg	neg	no	n/a	n/a	n/a	n/a	n/a	96	55	74	73.6	83	68					n/a	n/a	n/a	n/a			not done	na	na	on warfarin for DVT		na	na	4.4	4.2	4.1	na	na	9.8	10	11.3	7.5
				living	unrelated		A	w	high	pos	Neg	yes	1	n/a	n/a	n/a	n/a	134	50	111	61.9	112	61	107	64	85	88	n/a	n/a	n/a	n/a			ND	na	na	indicated bx done on 1-11-2010-Normal		na	na	4.8	4.6	6.5	5.9	na	11.5	11.5	11	10.2
				living	related		A	w	high	neg	neg	No	n/a	n/a	n/a	n/a	n/a	117	42	101	50	106	47	100	50	104	48	n/a	n/a	n/a	n/a			ND	na	na	on warfarin for DVT		N/A	N/A	4.9	4.7	4.5	5	5.6	26.3	15.6	10.7	6.4
				DBD	n/a		A	w	high	pos	Neg	yes	1	n/a	n/a	n/a	n/a	131	39	105	50	92	58	124	41	101	52	n/a	n/a	n/a	n/a			ND	na	na	complex anatomy, urostomy, recurrent UTIs and sepsis		na	na	7	4.8	not available	3.5	na	16.6	10.9	10.3	6.5
				living	unrelated		A	W	high	neg	neg	no	n/a	n/a	n/a	n/a	n/a	209	30	214	28	190	32	159	40	153	41	n/a	n/a	n/a	n/a			ND	n/a	na	on warfarin, bench surgey for resection of AML, fluid collections around Tx		na	na	3.3	na	not available	na	na	14.6	14.6	17.8	6.4
				living	unrelated		A	w	high	pos	pos	No	n/a	n/a	n/a	n/a	n/a	100	54	93	58	118	44	na	na	125	41	n/a	n/a	n/a	n/a			448	Chronic vascular changes	na	na		na	na	4	4.6	4	4.3	na	8.6	8.2	11.1	8
				DBD	n/a		A	W	high	no data available	pos	no	n/a	n/a	n/a	n/a	n/a	89	59	93	56	109	47	104	49			n/a	n/a	n/a	n/a			120	normal	n/a	n/a	normal	n/a	n/a	3.1	none	none	4.3		6.8	4.6	10.5	7.4
				DCD	n/a		A	W	high	neg	neg	no	n/a	n/a	n/a	n/a	n/a	135	48	139	46	127	51					n/a	n/a	n/a	n/a			79	focal tubular calcification	n/a	n/a	normal	n/a	n/a	5.9	none	5.7			14.5	8.8	10.3	11.9
				living	related		A	W	high	pos	neg	yes	1	n/a	n/a	n/a	n/a	207	32	204	33	169	40	179	38			10	borderline	n/a	n/a			186	30% chronic damage, inadequate vascular sampling	n/a	n/a	normal	n/a	n/a	5.3	3.8	5	6.1		7.6	9.9	10.8	2.4
				living - altruistic	unrelated		A	W	high	pos	neg	yes	1	n/a	n/a	n/a	n/a	81	84.3	99	91							n/a	n/a	n/a	n/a			126	NAD	n/a	n/a		diabetic		8.5	5.6				32	15.1	10.1	7.5
				living	unrelated		A	W	High	neg	pos	no	n/a	n/a	n/a	n/a	n/a	69	75	89	55	81	62.1					152	1A					92	NAD	n/a	n/a				5.9	6.5	5.6			8.8	9.9	7.1	6.9
				DBD	n/a		A	W	high	pos	neg	yes	1	n/a	n/a	n/a	n/a	121	55	114	59.5	135	49	130	51	116	58	11	Borderline	138	acute tubular injury			57	normal	n/a	n/a	normal	n/a	n/a	5.4	4.3	4.7	4.3	5.2	5.2	9.2	8.7	7.8
				living	related		A	W	high	pos	neg	yes	1	n/a	n/a	n/a	n/a	120	62.1	113	66.1	117	63.5					n/a	n/a	n/a	n/a			78	inadequate, normal	n/a	n/a		n/a	n/a	5.9	6.1	7.8			13.3	11.6	11.8	8.8
				DBD	n/a		A	F	high		pos	no	n/a	n/a	n/a	2013-04-07	renal vein transected, removed for life threatening bleeding											n/a	n/a	n/a	n/a
[truncated: 37 more columns]

## Sheet: Sheet2
Tx date	Initial regimen	Age (days)	Age (years)
2010-08-25	high	#REF!	#REF!
2013-03-27	high	#REF!	#REF!
2012-09-12	High	#REF!	#REF!
2011-05-03	high	#REF!	#REF!
2011-04-16	high	#REF!	#REF!
2011-01-20	high	#REF!	#REF!
2012-02-29	high	#REF!	#REF!
2012-08-01	high	#REF!	#REF!
2012-01-25	high	#REF!	#REF!
2011-11-01	high	#REF!	#REF!
2011-07-13	high	#REF!	#REF!
2011-11-30	high	#REF!	#REF!
2012-02-14	high	#REF!	#REF!
2011-04-27	high	#REF!	#REF!
2010-07-21	high	#REF!	#REF!
2012-09-26	high	#REF!	#REF!
2012-02-01	high	#REF!	#REF!
2011-01-12	high	#REF!	#REF!
2013-03-22	high	#REF!	#REF!
2010-08-06	high	#REF!	#REF!
2011-03-30	high	#REF!	#REF!
2013-01-01	high	#REF!	#REF!
2011-02-23	high	#REF!	#REF!
2010-10-27	high	#REF!	#REF!
2012-02-29	high	#REF!	#REF!
2013-04-06	high	#REF!	#REF!
2010-12-05	high	#REF!	#REF!
2010-12-03	high	#REF!	#REF!
2010-08-18	high	#REF!	#REF!
2010-09-29	high	#REF!	#REF!
2010-07-30	high	#REF!	#REF!
2012-04-11	high	#REF!	#REF!
2012-10-21	high	#REF!	#REF!
2012-03-12	high	#REF!	#REF!
2011-06-08	high	#REF!	#REF!
2012-01-26	high	#REF!	#REF!
2011-08-03	high	#REF!	#REF!
2012-07-04	high	#REF!	#REF!
2010-09-22	high	#REF!	#REF!
2012-03-28	high	#REF!	#REF!
2013-01-02	high	#REF!	#REF!
2012-09-14	high	#REF!	#REF!
2010-07-14	high	#REF!	#REF!
2013-03-30	high	#REF!	#REF!
2013-01-16	high	#REF!	#REF!
2010-10-07	high	#REF!	#REF!
2012-02-22	high	#REF!	#REF!
2010-10-13	high	#REF!	#REF!
2010-07-28	high	#REF!	#REF!
2011-10-19	high	#REF!	#REF!
2013-05-15	high	#REF!	#REF!
2013-03-26	high	#REF!	#REF!
2011-09-21	high	#REF!	#REF!
2011-11-18	high	#REF!	#REF!
2010-07-07	high	#REF!	#REF!
2012-07-04	High	#REF!	#REF!
2011-05-26	high	#REF!	#REF!
2011-09-14	high	#REF!	#REF!
2012-12-01	high	#REF!	#REF!
2012-08-29	high	#REF!	#REF!
2011-10-12	high	#REF!	#REF!
2010-09-08	high	#REF!	#REF!
2011-03-16	high	#REF!	#REF!
2012-04-09	high	#REF!	#REF!
2013-01-07	high	#REF!	#REF!
2011-03-13	high	#REF!	#REF!
2012-08-27	high	#REF!	#REF!
2013-04-17	high	#REF!	#REF!
2012-02-01	high	#REF!	#REF!
2010-09-01	high	#REF!	#REF!
2011-06-15	high	#REF!	#REF!
2010-12-25	high	#REF!	#REF!
2013-01-17	high	#REF!	#REF!
2012-08-29	low	#REF!	#REF!
2011-11-28	low	#REF!	#REF!
2012-12-09	low	#REF!	#REF!
2010-08-11	low	#REF!	#REF!
2012-06-06	low	#REF!	#REF!
2012-10-17	low	#REF!	#REF!
2010-07-21	low	#REF!	#REF!
2013-06-18	low	#REF!	#REF!
2011-12-28	low	#REF!	#REF!
2011-10-12	low	#REF!	#REF!
2012-07-23	low	#REF!	#REF!
2011-10-01	low	#REF!	#REF!
2013-05-10	low	#REF!	#REF!
2013-05-12	low	#REF!	#REF!
2011-02-09	low	#REF!	#REF!
2011-04-06	low	#REF!	#REF!
2013-01-25	low	#REF!	#REF!
2011-03-23	low	#REF!	#REF!
2013-03-25	low	#REF!	#REF!
2012-08-29	low	#REF!	#REF!
2010-12-08	low	#REF!	#REF!
2011-06-22	low	#REF!	#REF!
2012-03-19	low	#REF!	#REF!
2012-07-25	low	#REF!	#REF!
2011-08-31	low	#REF!	#REF!
2012-08-04	low	#REF!	#REF!
2011-12-11	low	#REF!	#REF!
2013-06-19	low	#REF!	#REF!
2012-08-22	low	#REF!	#REF!
2011-05-25	low	#REF!	#REF!
2012-09-19	low	#REF!	#REF!
2013-04-21	low	#REF!	#REF!
2011-01-26	low	#REF!	#REF!
2013-06-05	low	#REF!	#REF!
2012-05-14	low	#REF!	#REF!
2011-01-24	low	#REF!	#REF!
2013-02-01	low	#REF!	#REF!
2012-04-25	low	#REF!	#REF!
2012-03-14	low	#REF!	#REF!
2011-10-28	low	#REF!	#REF!
2011-07-05	low	#REF!	#REF!
2012-03-20	low	#REF!	#REF!
2011-09-21	low	#REF!	#REF!
2012-07-02	low	#REF!	#REF!
2012-02-22	low	#REF!	#REF!
2013-03-16	low	#REF!	#REF!
2010-10-12	low	#REF!	#REF!
2012-10-31	low	#REF!	#REF!
2012-11-29	low	#REF!	#REF!
2013-02-19	low	#REF!	#REF!
2012-10-25	low	#REF!	#REF!
2012-07-23	low	#REF!	#REF!
2012-03-28	low	#REF!	#REF!
2010-12-06	low	#REF!	#REF!
2011-02-02	low	#REF!	#REF!
2012-09-25	low	#REF!	#REF!
2013-02-06	low	#REF!	#REF!
2010-12-04	low	#REF!	#REF!
2013-03-20	low	#REF!	#REF!
2012-02-15	low	#REF!	#REF!
2013-05-24	low	#REF!	#REF!
2013-02-05	low	#REF!	#REF!
2012-01-05	low	#REF!	#REF!
2010-07-16	low	#REF!	#REF!
2011-02-02	low	#REF!	#REF!
2012-01-21	low	#REF!	#REF!
2012-02-22	low	#REF!	#REF!
2010-11-24	low	#REF!	#REF!
2011-12-12	low	#REF!	#REF!
2011-12-03	low	#REF!	#REF!
2012-02-08	low	#REF!	#REF!
2012-09-12	low	#REF!	#REF!
2012-11-07	low	#REF!	#REF!
2012-12-26	low	#REF!	#REF!
2013-04-26	low	#REF!	#REF!
2011-07-24	low	#REF!	#REF!
2011-11-22	low	#REF!	#REF!
2013-05-29	low	#REF!	#REF!
2012-07-25	low	#REF!	#REF!
2011-06-15	low	#REF!	#REF!
2012-05-23	low	#REF!	#REF!
2012-06-20	low	#REF!	#REF!
2013-03-30	low	#REF!	#REF!
2012-03-29	low	#REF!	#REF!
2010-09-07	low	#REF!	#REF!
2011-10-11	low	#REF!	#REF!
2013-03-06	low	#REF!	#REF!
2012-06-20	low	#REF!	#REF!
2011-07-11	low	#REF!	#REF!
2011-06-01	low	#REF!	#REF!
2011-04-24	low	#REF!	#REF!
2012-04-27	low	#REF!	#REF!
2013-04-28	low	#REF!	#REF!
2012-05-20	low	#REF!	#REF!
2012-04-30	low	#REF!	#REF!
2012-06-20	low	#REF!	#REF!
2011-02-09	low	#REF!	#REF!
2010-10-01	low	#REF!	#REF!
2011-01-24	low	#REF!	#REF!
2010-12-10	low	#REF!	#REF!
2013-01-17	low	#REF!	#REF!
2011-12-07	low	#REF!	#REF!
2012-11-07	low	#REF!	#REF!
2011-08-03	low	#REF!	#REF!
2013-06-07	low	#REF!	#REF!
2012-09-05	low	#REF!	#REF!
2012-05-16	low	#REF!	#REF!
2012-05-02	low	#REF!	#REF!
2011-01-05	low	#REF!	#REF!
2011-10-12	low	#REF!	#REF!
2013-04-24	low	#REF!	#REF!
2012-08-30	low	#REF!	#REF!
2013-04-26	low	#REF!	#REF!
2013-03-12	low	#REF!	#REF!
2013-04-24	low	#REF!	#REF!
2012-10-24	low	#REF!	#REF!
2013-01-12	low	#REF!	#REF!
2012-05-14	low	#REF!	#REF!
2012-12-20	low	#REF!	#REF!
2011-10-01	low	#REF!	#REF!
2011-10-12	low	#REF!	#REF!
2011-02-16	low	#REF!	#REF!
2010-12-10	low	#REF!	#REF!
2012-04-26	low	#REF!	#REF!
2011-05-07	low	#REF!	#REF!
2013-01-16	low	#REF!	#REF!
2012-12-12	low	#REF!	#REF!
2012-08-10	low	#REF!	#REF!
2010-11-24	low	#REF!	#REF!
2012-10-10	low	#REF!	#REF!
2011-07-03	low	#REF!	#REF!
2011-05-11	low	#REF!	#REF!
2012-01-04	low	#REF!	#REF!
2012-09-27	low	#REF!	#REF!
2012-08-15	low	#REF!	#REF!
2012-05-08	low	#REF!	#REF!
2011-08-31	low	#REF!	#REF!
2011-11-23	low	#REF!	#REF!
2012-08-08	low	#REF!	#REF!
2012-10-10	low	#REF!	#REF!
2010-10-20	low	#REF!	#REF!
2010-09-15	low	#REF!	#REF!
2012-01-18	low	#REF!	#REF!
2013-03-25	low	#REF!	#REF!
2012-04-23	low	#REF!	#REF!
2010-09-29	low	#REF!	#REF!
2012-08-27	low	#REF!	#REF!
2012-10-04	low	#REF!	#REF!
2011-10-05	low	#REF!	#REF!
2010-08-18	low	#REF!	#REF!
2011-02-19	low	#REF!	#REF!
2011-04-14	low	#REF!	#REF!
2012-04-26	low	#REF!	#REF!
2010-11-03	low	#REF!	#REF!
2013-03-03	low	#REF!	#REF!
2011-10-12	low	#REF!	#REF!
2012-04-16	low	#REF!	#REF!
2011-09-07	low	#REF!	#REF!
2013-01-10	low	#REF!	#REF!
2011-03-02	low	#REF!	#REF!
2011-09-11	low	#REF!	#REF!
2011-08-19	low	#REF!	#REF!
2012-12-12	low	#REF!	#REF!
2012-08-14	low	#REF!	#REF!
2013-02-20	low	#REF!	#REF!
2010-07-24	low	#REF!	#REF!
2011-01-04	low	#REF!	#REF!
2012-08-30	low	#REF!	#REF!
2013-06-14	low	#REF!	#REF!
2011-06-29	low	#REF!	#REF!
2012-11-19	low	#REF!	#REF!
2012-04-22	low	#REF!	#REF!
2011-10-26	low	#REF!	#REF!
2010-09-07	low	#REF!	#REF!
2012-10-25	low	#REF!	#REF!
2011-05-25	low	#REF!	#REF!
2012-03-21	low	#REF!	#REF!
2012-08-23	low	#REF!	#REF!
2013-04-03	low	#REF!	#REF!
2013-02-06	low	#REF!	#REF!
2013-01-18	low	#REF!	#REF!
2012-09-23	low	#REF!	#REF!
2013-02-01	low	#REF!	#REF!
2010-12-01	low	#REF!	#REF!
2012-07-18	low	#REF!	#REF!
2013-01-01	low	#REF!	#REF!
2012-09-13	low	#REF!	#REF!
2013-05-25	low	#REF!	#REF!
2013-03-03	low	#REF!	#REF!
2010-11-10	low	#REF!	#REF!
2012-04-16	low	#REF!	#REF!
2013-04-25	low	#REF!	#REF!
2012-11-08	low	#REF!	#REF!
2012-05-01	low	#REF!	#REF!
2013-03-19	low	#REF!	#REF!
2012-12-19	low	#REF!	#REF!
2012-06-27	low	#REF!	#REF!
2012-03-14	low	#REF!	#REF!
2012-12-18	low	#REF!	#REF!
2012-09-13	low	#REF!	#REF!
2011-12-14	low	#REF!	#REF!
2011-08-17	low	#REF!	#REF!
2012-08-22	low	#REF!	#REF!
2013-05-25	low	#REF!	#REF!
2012-10-09	low	#REF!	#REF!
2013-05-23	low	#REF!	#REF!
2012-04-10	low	#REF!	#REF!
2013-02-07	low	#REF!	#REF!
2012-10-04	low	#REF!	#REF!
2012-08-28	low	#REF!	#REF!
2012-10-29	low	#REF!	#REF!
2012-02-08	low	#REF!	#REF!
2012-12-18	low	#REF!	#REF!
2013-01-18	low	#REF!	#REF!
2011-04-17	low	#REF!	#REF!
2012-10-30	low	#REF!	#REF!
2012-07-31	low	#REF!	#REF!
2011-08-17	low	#REF!	#REF!
2012-01-03	low	#REF!	#REF!
2012-10-09	low	#REF!	#REF!
2013-01-13	low	#REF!	#REF!
2010-10-06	low	#REF!	#REF!
2010-08-18	low	#REF!	#REF!
2012-09-25	low	#REF!	#REF!
2010-08-28	low	#REF!	#REF!

## Sheet: Sheet3
Tx date	Initial regimen	donortype	Living type	Date of death	Date of graft loss	date	Days alive
2011-09-21	low	DBD	n/a	2012-03-16	n/a	2012-03-16	177
	high	DBD	n/a	2012-07-03	n/a	2012-07-03
	low	DBD	n/a	2012-09-08	n/a	2012-09-08
	low	DBD	n/a	2012-11-25	n/a	2012-11-25
	low	DBD	n/a	2013-05-19	n/a	2013-05-19
	low	DBD	n/a	LTF	LTF	2013-09-30
	high	DBD	n/a	n	n/a	2013-09-30
	high	living	related	n/a	n/a	2013-09-30
	high	living	unrelated	n/a	n/a	2013-09-30
	high	living	unrelated	n/a	n/a	2013-09-30
	high	DBD	n/a	n/a	n/a	2013-09-30
	high	living	related	n/a	n/a	2013-09-30
	high	DBD	n/a	n/a	n/a	2013-09-30
	high	living - altruistic	unrelated	n/a	n/a	2013-09-30
	High	living	unrelated	n/a	n/a	2013-09-30
	high	DCD	n/a	n/a	n/a	2013-09-30
	high	DBD	n/a	n/a	n/a	2013-09-30
	high	DBD	n/a	n/a	n/a	2013-09-30
	high	DBD	n/a	n/a	n/a	2013-09-30
	high	DBD	n/a	n/a	n/a	2013-09-30
	high	DBD	n/a	n/a	n/a	2013-09-30
	high	DBD	n/a	n/a	n/a	2013-09-30
	high	DBD	n/a	n/a	n/a	2013-09-30
	high	DBD	n/a	n/a	n/a	2013-09-30
	high	DBD	n/a	n/a	n/a	2013-09-30
	high	DBD	n/a	n/a	n/a	2013-09-30
	high	DBD	n/a	n/a	2013-04-07	2013-09-30
	high	DBD	n/a	n/a	n/a	2013-09-30
	high	DBD	n/a	n/a	n/a	2013-09-30
	high	DBD	n/a	n/a	n/a	2013-09-30
	high	DBD	n/a	n/a	n/a	2013-09-30
	high	DBD	n/a	n/a	n/a	2013-09-30
	high	DBD	n/a	n/a	n/a	2013-09-30
	high	DBD	n/a	n/a	n/a	2013-09-30
	high	DBD	n/a	n/a	n/a	2013-09-30
	high	DBD	n/a	n/a	n/a	2013-09-30
	high	DBD	n/a	n/a	n/a	2013-09-30
	high	DBD	n/a	n/a	n/a	2013-09-30
	high	DBD	n/a	n/a	n/a	2013-09-30
	high	DBD	n/a	n/a	n/a	2013-09-30
	high	DBD	n/a	n/a	n/a	2013-09-30
	high	DBD	n/a	n/a	n/a	2013-09-30
	high	DBD	n/a	n/a	n/a	2013-09-30
	high	DCD	n/a	n/a	n/a	2013-09-30
	high	DCD	n/a	n/a	n/a	2013-09-30
	high	DCD	n/a	n/a	n/a	2013-09-30
	high	living	related	n/a	n/a	2013-09-30
	high	living	unrelated	n/a	n/a	2013-09-30
	high	living	unrelated	n/a	n/a	2013-09-30
	high	living	unrelated	n/a	n/a	2013-09-30
	high	living	related	n/a	n/a	2013-09-30
	high	living	related	n/a	n/a	2013-09-30
	high	living	related	n/a	n/a	2013-09-30
	high	living	related	n/a	n/a	2013-09-30
	high	living	related	n/a	n/a	2013-09-30
	high	living	related	n/a	n/a	2013-09-30
	high	living	related	n/a	n/a	2013-09-30
	high	living	related	n/a	n/a	2013-09-30
	high	living	related	n/a	n/a	2013-09-30
	high	living	related	n/a	n/a	2013-09-30
	High	living	related	n/a	n/a	2013-09-30
	high	living	related	n/a	n/a	2013-09-30
	high	living	unrelated	n/a	n/a	2013-09-30
	high	living	unrelated	n/a	n/a	2013-09-30
	high	living	unrelated	n/a	n/a	2013-09-30
	high	living	unrelated	n/a	n/a	2013-09-30
	high	living	unrelated	n/a	n/a	2013-09-30
	high	living	unrelated	n/a	n/a	2013-09-30
	high	living	unrelated	n/a	n/a	2013-09-30
	high	living	unrelated	n/a	n/a	2013-09-30
	high	living	unrelated	n/a	n/a	2013-09-30
	high	living	unrelated	n/a	n/a	2013-09-30
2011-03-16	high	living	related	n/a	n/a	2013-09-30	929
2013-03-26	high	living - altruistic	unrelated	n/a	n/a	2013-09-30	188
2013-04-17	high	living - altruistic	unrelated	n/a	n/a	2013-09-30	166
2012-04-11	high	living - paired	unrelated	n/a	n/a	2013-09-30	537
2012-02-01	high	living - paired	unrelated	n/a	n/a	2013-09-30	607
2012-02-01	high	living - paired	unrelated	n/a	n/a	2013-09-30	607
2011-02-09	low	living	unrelated	n/a	n/a	2013-09-30	964
2012-03-28	low	living	unrelated	n/a	n/a	2013-09-30	551
2012-08-08	low	living	unrelated	n/a	n/a	2013-09-30	418
2013-02-19	low	DBD	n/a	n/a	n/a	2013-09-30	223
2011-06-22	low	living	related	n/a	n/a	2013-09-30	831
2011-04-14	low	DBD	n/a	n/a	n/a	2013-09-30	900
2012-02-08	low	living	related	n/a	n/a	2013-09-30	600
2012-04-26	low	DBD	n/a	n/a	n/a	2013-09-30	522
2010-09-15	low	living	related	n/a	n/a	2013-09-30	1111
2012-10-09	low	DBD	n/a	n/a	2013-01-02	2013-01-02	85
2012-06-20	low	DCD	n/a	n/a	n/a	2013-09-30	467
2011-08-31	low	living	unrelated	n/a	n/a	2013-09-30	761
2011-07-03	low	DCD	n/a	n/a	n/a	2013-09-30	820
2010-10-20	low	living	related	n/a	n/a	2013-09-30	1076
2011-03-02	low	living	related	n/a	n/a	2013-09-30	943
2013-02-20	low	living	related	n/a	n/a	2013-09-30	222
2010-12-04	low	DBD	n/a	n/a	n/a	2013-09-30	1031
2013-03-03	low	DCD	n/a	n/a	n/a	2013-09-30	211
2010-11-10	low	living	related	n/a	n/a	2013-09-30	1055
2012-03-14	low	living	related	n/a	n/a	2013-09-30	565
2010-11-24	low	living	related	n/a	n/a	2013-09-30	1041
2013-03-03	low	DCD	n/a	n/a	n/a	2013-09-30	211
2012-05-23	low	living	unrelated	n/a	n/a	2013-09-30	495
2012-08-27	low	DBD	n/a	n/a	n/a	2013-09-30	399
2013-05-10	low	DCD	n/a	n/a	n/a	2013-09-30	143
2011-10-05	low	living	unrelated	n/a	n/a	2013-09-30	726
2011-08-19	low	living - altruistic	unrelated	n/a	n/a	2013-09-30	773
2011-02-09	low	DBD	n/a	n/a	n/a	2013-09-30	964
2013-03-25	low	DBD	n/a	n/a	n/a	2013-09-30	189
2012-12-18	low	DCD	n/a	n/a	n/a	2013-09-30	286
2011-10-12	low	DBD	n/a	n/a	n/a	2013-09-30	719
2013-02-05	low	DBD	n/a	n/a	n/a	2013-09-30	237
2012-04-16	low	DBD	n/a	n/a	n/a	2013-09-30	532
2012-04-16	low	DBD	n/a	n/a	n/a	2013-09-30	532
2013-06-18	low	DBD	n/a	n/a	n/a	2013-09-30	104
2012-12-09	low	DBD	n/a	n/a	n/a	2013-09-30	295
2010-12-06	low	DBD	n/a	n/a	n/a	2013-09-30	1029
2012-10-09	low	DBD	n/a	n/a	n/a	2013-09-30	356
2012-12-20	low	DBD	n/a	n/a	n/a	2013-09-30	284
2012-08-28	low	DBD	n/a	n/a	n/a	2013-09-30	398
2013-02-06	low	DBD	n/a	n/a	n/a	2013-09-30	236
2012-12-26	low	DBD	n/a	n/a	n/a	2013-09-30	278
2011-12-12	low	DBD	n/a	n/a	n/a	2013-09-30	658
2012-07-31	low	DBD	n/a	n/a	n/a	2013-09-30	426
2012-08-14	low	DBD	n/a	n/a	n/a	2013-09-30	412
2013-01-25	low	DBD	n/a	n/a	n/a	2013-09-30	248
2013-03-25	low	DBD	n/a	n/a	n/a	2013-09-30	189
2012-11-29	low	DBD	n/a	n/a	n/a	2013-09-30	305
2011-08-17	low	DBD	n/a	n/a	n/a	2013-09-30	775
2012-05-08	low	DBD	n/a	n/a	n/a	2013-09-30	510
2013-01-13	low	DBD	n/a	n/a	n/a	2013-09-30	260
2012-07-02	low	DBD	n/a	n/a	n/a	2013-09-30	455
2013-03-19	low	DBD	n/a	n/a	n/a	2013-09-30	195
2012-09-13	low	DBD	n/a	n/a	n/a	2013-09-30	382
2012-08-10	low	DBD	n/a	n/a	n/a	2013-09-30	416
2012-11-19	low	DBD	n/a	n/a	n/a	2013-09-30	315
2011-12-03	low	DBD	n/a	n/a	n/a	2013-09-30	667
2011-12-28	low	DBD	n/a	n/a	n/a	2013-09-30	642
2013-06-14	low	DBD	n/a	n/a	n/a	2013-09-30	108
2010-08-18	low	DBD	n/a	n/a	n/a	2013-09-30	1139
2013-04-21	low	DBD	n/a	n/a	n/a	2013-09-30	162
2011-12-11	low	DBD	n/a	n/a	n/a	2013-09-30	659
2012-04-22	low	DBD	n/a	n/a	n/a	2013-09-30	526
2013-01-12	low	DBD	n/a	n/a	n/a	2013-09-30	261
2012-11-08	low	DBD	n/a	n/a	n/a	2013-09-30	326
2012-05-20	low	DBD	n/a	n/a	n/a	2013-09-30	498
2012-08-23	low	DBD	n/a	n/a	n/a	2013-09-30	403
2012-08-04	low	DBD	n/a	n/a	n/a	2013-09-30	422
2013-03-30	low	DBD	n/a	n/a	n/a	2013-09-30	184
2013-03-16	low	DBD	n/a	n/a	n/a	2013-09-30	198
2012-05-01	low	DBD	n/a	n/a	n/a	2013-09-30	517
2012-07-25	low	DBD	n/a	n/a	n/a	2013-09-30	432
2012-05-14	low	DBD	n/a	n/a	n/a	2013-09-30	504
2010-10-12	low	DBD	n/a	n/a	n/a	2013-09-30	1084
2012-03-19	low	DBD	n/a	n/a	n/a	2013-09-30	560
2013-04-25	low	DBD	n/a	n/a	n/a	2013-09-30	158
2012-08-29	low	DBD	n/a	n/a	n/a	2013-09-30	397
2012-10-04	low	DBD	n/a	n/a	n/a	2013-09-30	361
2012-04-10	low	DBD	n/a	n/a	n/a	2013-09-30	538
2013-04-26	low	DBD	n/a	n/a	n/a	2013-09-30	157
2012-10-04	low	DBD	n/a	n/a	n/a	2013-09-30	361
2012-04-23	low	DBD	n/a	n/a	n/a	2013-09-30	525
2011-07-05	low	DBD	n/a	n/a	n/a	2013-09-30	818
2012-09-27	low	DBD	n/a	n/a	n/a	2013-09-30	368
2012-05-14	low	DBD	n/a	n/a	2012-05-16	2013-09-30	504
2011-09-07	low	DBD	n/a	n/a	2011-09-08	2013-09-30	754
2011-09-11	low	DBD	n/a	n/a	n/a	2013-09-30	750
2011-02-19	low	DBD	n/a	n/a	n/a	2013-09-30	954
2010-07-24	low	DBD	n/a	n/a	n/a	2013-09-30	1164
2011-10-12	low	DBD	n/a	n/a	n/a	2013-09-30	719
2011-01-04	low	DBD	n/a	n/a	n/a	2013-09-30	1000
2012-03-14	low	DBD	n/a	n/a	2012-03-15	2013-09-30	565
2012-10-29	low	DBD	n/a	n/a	2012-10-30	2013-09-30	336
2012-06-20	low	DBD	n/a	n/a	n/a	2013-09-30	467
2013-02-07	low	DBD	n/a	n/a	n/a	2013-09-30	235
2012-12-12	low	DBD	n/a	n/a	n/a	2013-09-30	292
2011-10-11	low	DBD	n/a	n/a	2011-12-01	2011-12-01	51
2013-05-12	low	DBD	n/a	n/a	n/a	2013-09-30	141
2011-07-11	low	DBD	n/a	n/a	n/a	2013-09-30	812
2013-04-24	low	DBD	n/a	n/a	n/a	2013-09-30	159
2013-05-24	low	DBD	n/a	n/a	n/a	2013-09-30	129
2012-03-20	low	DBD	n/a	n/a	n/a	2013-09-30	559
2013-01-10	low	DBD	n/a	n/a	n/a	2013-09-30	263
2013-01-01	low	DBD	n/a	n/a	n/a	2013-09-30	272
2013-01-17	low	DBD	n/a	n/a	n/a	2013-09-30	256
2012-04-26	low	DBD	n/a	n/a	n/a	2013-09-30	522
2012-09-23	low	DBD	n/a	n/a	n/a	2013-09-30	372
2012-01-21	low	DBD	n/a	n/a	n/a	2013-09-30	618
2013-04-28	low	DBD - dual	n/a	n/a	n/a	2013-09-30	155
2012-07-23	low	DCD	n/a	n/a	n/a	2013-09-30	434
2012-10-25	low	DCD	n/a	n/a	n/a	2013-09-30	340
2012-10-25	low	DCD	n/a	n/a	n/a	2013-09-30	340
2013-05-25	low	DCD	n/a	n/a	n/a	2013-09-30	128
2011-10-01	low	DCD	n/a	n/a	n/a	2013-09-30	730
2012-08-30	low	DCD	n/a	n/a	n/a	2013-09-30	396
2013-02-01	low	DCD	n/a	n/a	n/a	2013-09-30	241
2010-12-10	low	DCD	n/a	n/a	n/a	2013-09-30	1025
2010-12-10	low	DCD	n/a	n/a	20.12.2010	2013-09-30	1025
2013-06-07	low	DCD	n/a	n/a	n/a	2013-09-30	115
2010-09-07	low	DCD	n/a	n/a	n/a	2013-09-30	1119
2013-01-16	low	DCD	n/a	n/a	n/a	2013-09-30	257
2011-01-24	low	DCD	n/a	n/a	n/a	2013-09-30	980
2012-07-23	low	DCD	n/a	n/a	n/a	2013-09-30	434
2012-06-20	low	DCD	n/a	n/a	n/a	2013-09-30	467
2013-01-18	low	DCD	n/a	n/a	n/a	2013-09-30	255
2011-10-01	low	DCD	n/a	n/a	n/a	2013-09-30	730
2012-01-05	low	DCD	n/a	n/a	n/a	2013-09-30	634
2010-09-07	low	DCD	n/a	n/a	n/a	2013-09-30	1119
2011-01-24	low	DCD	n/a	n/a	n/a	2013-09-30	980
2012-08-30	low	DCD	n/a	n/a	n/a	2013-09-30	396
2013-05-25	low	DCD	n/a	n/a	2013-08-07	2013-08-07	74
2011-07-24	low	DCD	n/a	n/a	n/a	2013-09-30	799
2012-02-08	low	DCD	n/a	n/a	n/a	2013-09-30	600
2012-12-18	low	DCD	n/a	n/a	n/a	2013-09-30	286
2013-02-01	low	DCD	n/a	n/a	n/a	2013-09-30	241
2012-03-29	low	DCD	n/a	n/a	n/a	2013-09-30	550
2011-11-28	low	DCD	n/a	n/a	n/a	2013-09-30	672
2013-01-18	low	DCD	n/a	n/a	n/a	2013-09-30	255
2011-11-22	low	DCD	n/a	n/a	n/a	2013-09-30	678
2011-05-07	low	DCD	n/a	n/a	n/a	2013-09-30	877
2013-03-12	low	DCD	n/a	n/a	n/a	2013-09-30	202
2010-10-01	low	DCD	n/a	n/a	n/a	2013-09-30	1095
2012-04-30	low	DCD	n/a	n/a	2012-05-01	2013-09-30	518
2013-05-23	low	DCDx2	n/a	n/a	n/a	2013-09-30	130
2012-08-22	low	living	related	n/a	n/a	2013-09-30	404
2012-10-10	low	living	unrelated	n/a	n/a	2013-09-30	355
2011-06-29	low	living	related	n/a	n/a	2013-09-30	824
2010-07-21	low	living	related	n/a	n/a	2013-09-30	1167
2011-11-23	low	living	related	n/a	n/a	2013-09-30	677
2013-05-29	low	living	related	n/a	n/a	2013-09-30	124
2011-02-16	low	living	related	n/a	n/a	2013-09-30	957
2013-06-05	low	living	related	n/a	n/a	2013-09-30	117
2012-06-06	low	living	related	n/a	n/a	2013-09-30	481
2011-01-05	low	living	related	n/a	n/a	2013-09-30	999
2011-01-26	low	living	related	n/a	n/a	2013-09-30	978
2011-12-07	low	living	related	n/a	n/a	2013-09-30	663
2013-06-19	low	living	related	n/a	n/a	2013-09-30	103
2010-08-11	low	living	related	n/a	n/a	2013-09-30	1146
2011-10-12	low	living	related	n/a	n/a	2013-09-30	719
2011-10-26	low	living	related	n/a	n/a	2013-09-30	705
2010-12-01	low	living	related	n/a	n/a	2013-09-30	1034
2012-07-25	low	living	related	n/a	n/a	2013-09-30	432
2013-02-06	low	living	related	n/a	n/a	2013-09-30	236
2012-07-18	low	living	related	n/a	n/a	2013-09-30	439
2010-09-29	low	living	related	n/a	n/a	2013-09-30	1097
2010-12-08	low	living	related	n/a	n/a	2013-09-30	1027
2012-02-15	low	living	related	n/a	n/a	2013-09-30	593
2011-04-06	low	living	related	n/a	n/a	2013-09-30	908
2011-03-23	low	living	related	n/a	n/a	2013-09-30	922
2012-10-24	low	living	related	n/a	2012-10-26	2013-09-30	341
2012-10-10	low	living	related	n/a	n/a	2013-09-30	355
2012-11-07	low	living	related	n/a	n/a	2013-09-30	327
2012-10-17	low	living	related	n/a	n/a	2013-09-30	348
2011-05-25	low	living	related	n/a	n/a	2013-09-30	859
2011-02-02	low	living	related	n/a	n/a	2013-09-30	971
2012-04-25	low	living	related	n/a	n/a	2013-09-30	523
2012-09-12	low	living	related	n/a	n/a	2013-09-30	383
2012-10-31	low	living	related	n/a	n/a	2013-09-30	334
2012-09-05	low	living	related	n/a	n/a	2013-09-30	390
2012-03-21	low	living	related	n/a	n/a	2013-09-30	558
2012-12-12	low	living	related	n/a	n/a	2013-09-30	292
2012-05-16	low	living	related	n/a	n/a	2013-09-30	502
2012-02-22	low	living	related	n/a	n/a	2013-09-30	586
2012-05-02	low	living	related	2013-09-25	n/a	2013-09-30	511
2012-12-19	low	living	related	n/a	n/a	2013-09-30	285
2011-05-25	low	living	related	n/a	n/a	2013-09-30	859
2012-08-29	low	living	related	n/a	n/a	2013-09-30	397
2012-09-19	low	living	unrelated	n/a	n/a	2013-09-30	376
2012-11-07	low	living	unrelated	n/a	n/a	2013-09-30	327
2011-10-28	low	living	unrelated	n/a	n/a	2013-09-30	703
2010-11-24	low	living	unrelated	n/a	n/a	2013-09-30	1041
2013-03-20	low	living	unrelated	n/a	n/a	2013-09-30	194
2013-03-06	low	living	unrelated	n/a	n/a	2013-09-30	208
2012-01-04	low	living	unrelated	n/a	n/a	2013-09-30	635
2013-04-03	low	living	unrelated	n/a	n/a	2013-09-30	180
2011-05-11	low	living	unrelated	n/a	n/a	2013-09-30	873
2011-10-12	low	living	unrelated	n/a	n/a	2013-09-30	719
2011-06-15	low	living	unrelated	n/a	n/a	2013-09-30	838
2013-04-24	low	living	unrelated	n/a	n/a	2013-09-30	159
2010-11-03	low	living	unrelated	n/a	n/a	2013-09-30	1062
2011-06-01	low	living	unrelated	n/a	n/a	2013-09-30	852
2011-08-03	low	living	unrelated	n/a	n/a	2013-09-30	789
2011-08-31	low	living	unrelated	n/a	n/a	2013-09-30	761
2012-10-30	low	living - altruistic	unrelated	n/a	n/a	2013-09-30	335
2012-09-25	low	living - altruistic	unrelated	n/a	n/a	2013-09-30	370
2012-02-22	low	living - altruistic	unrelated	n/a	n/a	2013-09-30	586
2011-02-02	low	living - altruistic	unrelated	n/a	n/a	2013-09-30	971
2012-08-22	low	living - altruistic	unrelated	n/a	n/a	2013-09-30	404
2010-07-16	low	living - altruistic	unrelated	n/a	n/a	2013-09-30	1172
2011-08-17	low	living - altruistic	unrelated	n/a	n/a	2013-09-30	775
2013-04-26	low	living - paired	unrelated	n/a	n/a	2013-09-30	157
2012-08-15	low	living - paired	unrelated	n/a	n/a	2013-09-30	411
2012-01-18	low	living - paired	unrelated	n/a	n/a	2013-09-30	621
2011-12-14	low	living - paired	unrelated	n/a	n/a	2013-09-30	656
2012-06-27	low	living - paired	unrelated	n/a	n/a	2013-09-30	460
2012-09-25	low	DBD	n/a	n/a	n/a	2013-09-30	370
2010-08-28	low	DBD	n/a	n/a	n/a	2013-09-30	1129
2010-10-06	low	living	unrelated	n/a	n/a	2013-09-30	1090
2010-08-18	low	living	unrelated	n/a	n/a	2013-09-30	1139
2012-04-27	low	DBD	n/a	n/a	n/a	2013-09-30	521

## Sheet: Sheet4
Tx date	Initial regimen	donortype	Living type	Date of death	Date of graft loss	date	Days alive
2013-04-06	high	DBD	n/a	n/a	2013-04-07	2013-09-30	1
2011-06-15	high	DBD	n/a	2012-07-03	n/a	2012-07-03	384
2011-02-23	high	DBD	n/a	n	n/a	2013-09-30	950
2012-02-22	high	DBD	n/a	n/a	n/a	2013-09-30	586
2011-05-03	high	DBD	n/a	n/a	n/a	2013-09-30	881
2010-07-30	high	DBD	n/a	n/a	n/a	2013-09-30	1158
2013-01-07	high	DBD	n/a	n/a	n/a	2013-09-30	266
2011-03-13	high	DBD	n/a	n/a	n/a	2013-09-30	932
2012-03-12	high	DBD	n/a	n/a	n/a	2013-09-30	567
2010-12-05	high	DBD	n/a	n/a	n/a	2013-09-30	1030
2013-05-15	high	DBD	n/a	n/a	n/a	2013-09-30	138
2011-11-01	high	DBD	n/a	n/a	n/a	2013-09-30	699
2011-10-12	high	DBD	n/a	n/a	n/a	2013-09-30	719
2013-03-30	high	DBD	n/a	n/a	n/a	2013-09-30	184
2010-12-25	high	DBD	n/a	n/a	n/a	2013-09-30	1010
2012-09-14	high	DBD	n/a	n/a	n/a	2013-09-30	381
2013-01-01	high	DBD	n/a	n/a	n/a	2013-09-30	272
2012-01-26	high	DBD	n/a	n/a	n/a	2013-09-30	613
2012-08-27	high	DBD	n/a	n/a	n/a	2013-09-30	399
2013-03-22	high	DBD	n/a	n/a	n/a	2013-09-30	192
2011-05-26	high	DBD	n/a	n/a	n/a	2013-09-30	858
2012-12-01	high	DBD	n/a	n/a	n/a	2013-09-30	303
2010-12-03	high	DBD	n/a	n/a	n/a	2013-09-30	1032
2010-08-06	high	DBD	n/a	n/a	n/a	2013-09-30	1151
2012-07-04	high	DBD	n/a	n/a	n/a	2013-09-30	453
2012-10-21	high	DBD	n/a	n/a	n/a	2013-09-30	344
2011-11-18	high	DBD	n/a	n/a	n/a	2013-09-30	682
2011-04-16	high	DBD	n/a	n/a	n/a	2013-09-30	898
2013-01-16	high	DBD	n/a	n/a	n/a	2013-09-30	257
2010-10-27	high	DBD	n/a	n/a	n/a	2013-09-30	1069
2012-04-09	high	DBD	n/a	n/a	n/a	2013-09-30	539
2013-01-17	high	DCD	n/a	n/a	n/a	2013-09-30	256
2010-10-07	high	DCD	n/a	n/a	n/a	2013-09-30	1089
2011-01-20	high	DCD	n/a	n/a	n/a	2013-09-30	984
2012-03-28	high	DCD	n/a	n/a	n/a	2013-09-30	551
2011-09-14	high	living	related	n/a	n/a	2013-09-30	747
2010-09-08	high	living	unrelated	n/a	n/a	2013-09-30	1118
2012-02-29	high	living	unrelated	n/a	n/a	2013-09-30	579
2010-08-25	high	living	related	n/a	n/a	2013-09-30	1132
2012-07-04	High	living	unrelated	n/a	n/a	2013-09-30	453
2011-07-13	high	living	related	n/a	n/a	2013-09-30	810
2011-06-08	high	living	unrelated	n/a	n/a	2013-09-30	845
2011-03-30	high	living	unrelated	n/a	n/a	2013-09-30	915
2012-09-26	high	living	unrelated	n/a	n/a	2013-09-30	369
2012-02-29	high	living	related	n/a	n/a	2013-09-30	579
2012-08-01	high	living	related	n/a	n/a	2013-09-30	425
2011-09-21	high	living	related	n/a	n/a	2013-09-30	740
2013-03-27	high	living	related	n/a	n/a	2013-09-30	187
2011-10-19	high	living	related	n/a	n/a	2013-09-30	712
2011-01-12	high	living	related	n/a	n/a	2013-09-30	992
2011-04-27	high	living	related	n/a	n/a	2013-09-30	887
2010-09-29	high	living	related	n/a	n/a	2013-09-30	1097
2012-01-25	high	living	related	n/a	n/a	2013-09-30	614
2011-11-30	high	living	related	n/a	n/a	2013-09-30	670
2012-09-12	High	living	related	n/a	n/a	2013-09-30	383
2010-09-01	high	living	related	n/a	n/a	2013-09-30	1125
2010-07-14	high	living	unrelated	n/a	n/a	2013-09-30	1174
2010-10-13	high	living	unrelated	n/a	n/a	2013-09-30	1083
2013-01-02	high	living	unrelated	n/a	n/a	2013-09-30	271
2010-07-21	high	living	unrelated	n/a	n/a	2013-09-30	1167
2010-09-22	high	living	unrelated	n/a	n/a	2013-09-30	1104
2010-08-18	high	living	unrelated	n/a	n/a	2013-09-30	1139
2011-08-03	high	living	unrelated	n/a	n/a	2013-09-30	789
2012-08-29	high	living	unrelated	n/a	n/a	2013-09-30	397
2010-07-28	high	living	unrelated	n/a	n/a	2013-09-30	1160
2010-07-07	high	living	unrelated	n/a	n/a	2013-09-30	1181
2011-03-16	high	living	related	n/a	n/a	2013-09-30	929
2012-02-14	high	living - altruistic	unrelated	n/a	n/a	2013-09-30	594
2013-03-26	high	living - altruistic	unrelated	n/a	n/a	2013-09-30	188
2013-04-17	high	living - altruistic	unrelated	n/a	n/a	2013-09-30	166
2012-04-11	high	living - paired	unrelated	n/a	n/a	2013-09-30	537
2012-02-01	high	living - paired	unrelated	n/a	n/a	2013-09-30	607
2012-02-01	high	living - paired	unrelated	n/a	n/a	2013-09-30	607
2011-09-07	low	DBD	n/a	n/a	2011-09-08	2013-09-30	0
2011-10-11	low	DBD	n/a	n/a	2011-12-01	2011-12-01	51
2012-03-14	low	DBD	n/a	n/a	2012-03-15	2013-09-30	1
2012-05-14	low	DBD	n/a	n/a	2012-05-16	2013-09-30	2
2012-10-29	low	DBD	n/a	n/a	2012-10-30	2013-09-30	1
2012-10-09	low	DBD	n/a	n/a	2013-01-02	2013-01-02	85
2011-04-24	low	DBD	n/a	LTF	LTF	2013-09-30	88
2011-09-21	low	DBD	n/a	2012-03-16	n/a	2012-03-16	177
2012-01-03	low	DBD	n/a	2012-09-08	n/a	2012-09-08	249
2012-09-13	low	DBD	n/a	2012-11-25	n/a	2012-11-25	73
2011-04-17	low	DBD	n/a	2013-05-19	n/a	2013-05-19	763
2013-02-19	low	DBD	n/a	n/a	n/a	2013-09-30	223
2011-04-14	low	DBD	n/a	n/a	n/a	2013-09-30	900
2012-04-26	low	DBD	n/a	n/a	n/a	2013-09-30	522
2010-12-04	low	DBD	n/a	n/a	n/a	2013-09-30	1031
2012-08-27	low	DBD	n/a	n/a	n/a	2013-09-30	399
2011-02-09	low	DBD	n/a	n/a	n/a	2013-09-30	964
2013-03-25	low	DBD	n/a	n/a	n/a	2013-09-30	189
2011-10-12	low	DBD	n/a	n/a	n/a	2013-09-30	719
2013-02-05	low	DBD	n/a	n/a	n/a	2013-09-30	237
2012-04-16	low	DBD	n/a	n/a	n/a	2013-09-30	532
2012-04-16	low	DBD	n/a	n/a	n/a	2013-09-30	532
2013-06-18	low	DBD	n/a	n/a	n/a	2013-09-30	104
2012-12-09	low	DBD	n/a	n/a	n/a	2013-09-30	295
2010-12-06	low	DBD	n/a	n/a	n/a	2013-09-30	1029
2012-10-09	low	DBD	n/a	n/a	n/a	2013-09-30	356
2012-12-20	low	DBD	n/a	n/a	n/a	2013-09-30	284
2012-08-28	low	DBD	n/a	n/a	n/a	2013-09-30	398
2013-02-06	low	DBD	n/a	n/a	n/a	2013-09-30	236
2012-12-26	low	DBD	n/a	n/a	n/a	2013-09-30	278
2011-12-12	low	DBD	n/a	n/a	n/a	2013-09-30	658
2012-07-31	low	DBD	n/a	n/a	n/a	2013-09-30	426
2012-08-14	low	DBD	n/a	n/a	n/a	2013-09-30	412
2013-01-25	low	DBD	n/a	n/a	n/a	2013-09-30	248
2013-03-25	low	DBD	n/a	n/a	n/a	2013-09-30	189
2012-11-29	low	DBD	n/a	n/a	n/a	2013-09-30	305
2011-08-17	low	DBD	n/a	n/a	n/a	2013-09-30	775
2012-05-08	low	DBD	n/a	n/a	n/a	2013-09-30	510
2013-01-13	low	DBD	n/a	n/a	n/a	2013-09-30	260
2012-07-02	low	DBD	n/a	n/a	n/a	2013-09-30	455
2013-03-19	low	DBD	n/a	n/a	n/a	2013-09-30	195
2012-09-13	low	DBD	n/a	n/a	n/a	2013-09-30	382
2012-08-10	low	DBD	n/a	n/a	n/a	2013-09-30	416
2012-11-19	low	DBD	n/a	n/a	n/a	2013-09-30	315
2011-12-03	low	DBD	n/a	n/a	n/a	2013-09-30	667
2011-12-28	low	DBD	n/a	n/a	n/a	2013-09-30	642
2013-06-14	low	DBD	n/a	n/a	n/a	2013-09-30	108
2010-08-18	low	DBD	n/a	n/a	n/a	2013-09-30	1139
2013-04-21	low	DBD	n/a	n/a	n/a	2013-09-30	162
2011-12-11	low	DBD	n/a	n/a	n/a	2013-09-30	659
2012-04-22	low	DBD	n/a	n/a	n/a	2013-09-30	526
2013-01-12	low	DBD	n/a	n/a	n/a	2013-09-30	261
2012-11-08	low	DBD	n/a	n/a	n/a	2013-09-30	326
2012-05-20	low	DBD	n/a	n/a	n/a	2013-09-30	498
2012-08-23	low	DBD	n/a	n/a	n/a	2013-09-30	403
2012-08-04	low	DBD	n/a	n/a	n/a	2013-09-30	422
2013-03-30	low	DBD	n/a	n/a	n/a	2013-09-30	184
2013-03-16	low	DBD	n/a	n/a	n/a	2013-09-30	198
2012-05-01	low	DBD	n/a	n/a	n/a	2013-09-30	517
2012-07-25	low	DBD	n/a	n/a	n/a	2013-09-30	432
2012-05-14	low	DBD	n/a	n/a	n/a	2013-09-30	504
2010-10-12	low	DBD	n/a	n/a	n/a	2013-09-30	1084
2012-03-19	low	DBD	n/a	n/a	n/a	2013-09-30	560
2013-04-25	low	DBD	n/a	n/a	n/a	2013-09-30	158
2012-08-29	low	DBD	n/a	n/a	n/a	2013-09-30	397
2012-10-04	low	DBD	n/a	n/a	n/a	2013-09-30	361
2012-04-10	low	DBD	n/a	n/a	n/a	2013-09-30	538
2013-04-26	low	DBD	n/a	n/a	n/a	2013-09-30	157
2012-10-04	low	DBD	n/a	n/a	n/a	2013-09-30	361
2012-04-23	low	DBD	n/a	n/a	n/a	2013-09-30	525
2011-07-05	low	DBD	n/a	n/a	n/a	2013-09-30	818
2012-09-27	low	DBD	n/a	n/a	n/a	2013-09-30	368
2011-09-11	low	DBD	n/a	n/a	n/a	2013-09-30	750
2011-02-19	low	DBD	n/a	n/a	n/a	2013-09-30	954
2010-07-24	low	DBD	n/a	n/a	n/a	2013-09-30	1164
2011-10-12	low	DBD	n/a	n/a	n/a	2013-09-30	719
2011-01-04	low	DBD	n/a	n/a	n/a	2013-09-30	1000
2012-06-20	low	DBD	n/a	n/a	n/a	2013-09-30	467
2013-02-07	low	DBD	n/a	n/a	n/a	2013-09-30	235
2012-12-12	low	DBD	n/a	n/a	n/a	2013-09-30	292
2013-05-12	low	DBD	n/a	n/a	n/a	2013-09-30	141
2011-07-11	low	DBD	n/a	n/a	n/a	2013-09-30	812
2013-04-24	low	DBD	n/a	n/a	n/a	2013-09-30	159
2013-05-24	low	DBD	n/a	n/a	n/a	2013-09-30	129
2012-03-20	low	DBD	n/a	n/a	n/a	2013-09-30	559
2013-01-10	low	DBD	n/a	n/a	n/a	2013-09-30	263
2013-01-01	low	DBD	n/a	n/a	n/a	2013-09-30	272
2013-01-17	low	DBD	n/a	n/a	n/a	2013-09-30	256
2012-04-26	low	DBD	n/a	n/a	n/a	2013-09-30	522
2012-09-23	low	DBD	n/a	n/a	n/a	2013-09-30	372
2012-01-21	low	DBD	n/a	n/a	n/a	2013-09-30	618
2013-04-28	low	DBD - dual	n/a	n/a	n/a	2013-09-30	155
2012-04-30	low	DCD	n/a	n/a	2012-05-01	2013-09-30	1
2013-05-25	low	DCD	n/a	n/a	2013-08-07	2013-08-07	74
2010-12-10	low	DCD	n/a	n/a	20.12.2010	2013-09-30	2
2012-06-20	low	DCD	n/a	n/a	n/a	2013-09-30	467
2011-07-03	low	DCD	n/a	n/a	n/a	2013-09-30	820
2013-03-03	low	DCD	n/a	n/a	n/a	2013-09-30	211
2013-03-03	low	DCD	n/a	n/a	n/a	2013-09-30	211
2013-05-10	low	DCD	n/a	n/a	n/a	2013-09-30	143
2012-12-18	low	DCD	n/a	n/a	n/a	2013-09-30	286
2012-07-23	low	DCD	n/a	n/a	n/a	2013-09-30	434
2012-10-25	low	DCD	n/a	n/a	n/a	2013-09-30	340
2012-10-25	low	DCD	n/a	n/a	n/a	2013-09-30	340
2013-05-25	low	DCD	n/a	n/a	n/a	2013-09-30	128
2011-10-01	low	DCD	n/a	n/a	n/a	2013-09-30	730
2012-08-30	low	DCD	n/a	n/a	n/a	2013-09-30	396
2013-02-01	low	DCD	n/a	n/a	n/a	2013-09-30	241
2010-12-10	low	DCD	n/a	n/a	n/a	2013-09-30	1025
2013-06-07	low	DCD	n/a	n/a	n/a	2013-09-30	115
2010-09-07	low	DCD	n/a	n/a	n/a	2013-09-30	1119
2013-01-16	low	DCD	n/a	n/a	n/a	2013-09-30	257
2011-01-24	low	DCD	n/a	n/a	n/a	2013-09-30	980
2012-07-23	low	DCD	n/a	n/a	n/a	2013-09-30	434
2012-06-20	low	DCD	n/a	n/a	n/a	2013-09-30	467
2013-01-18	low	DCD	n/a	n/a	n/a	2013-09-30	255
2011-10-01	low	DCD	n/a	n/a	n/a	2013-09-30	730
2012-01-05	low	DCD	n/a	n/a	n/a	2013-09-30	634
2010-09-07	low	DCD	n/a	n/a	n/a	2013-09-30	1119
2011-01-24	low	DCD	n/a	n/a	n/a	2013-09-30	980
2012-08-30	low	DCD	n/a	n/a	n/a	2013-09-30	396
2011-07-24	low	DCD	n/a	n/a	n/a	2013-09-30	799
2012-02-08	low	DCD	n/a	n/a	n/a	2013-09-30	600
2012-12-18	low	DCD	n/a	n/a	n/a	2013-09-30	286
2013-02-01	low	DCD	n/a	n/a	n/a	2013-09-30	241
2012-03-29	low	DCD	n/a	n/a	n/a	2013-09-30	550
2011-11-28	low	DCD	n/a	n/a	n/a	2013-09-30	672
2013-01-18	low	DCD	n/a	n/a	n/a	2013-09-30	255
2011-11-22	low	DCD	n/a	n/a	n/a	2013-09-30	678
2011-05-07	low	DCD	n/a	n/a	n/a	2013-09-30	877
2013-03-12	low	DCD	n/a	n/a	n/a	2013-09-30	202
2010-10-01	low	DCD	n/a	n/a	n/a	2013-09-30	1095
2013-05-23	low	DCDx2	n/a	n/a	n/a	2013-09-30	130
2012-10-24	low	living	related	n/a	2012-10-26	2013-09-30	2
2011-02-09	low	living	unrelated	n/a	n/a	2013-09-30	964
2012-03-28	low	living	unrelated	n/a	n/a	2013-09-30	551
2012-08-08	low	living	unrelated	n/a	n/a	2013-09-30	418
2011-06-22	low	living	related	n/a	n/a	2013-09-30	831
2012-02-08	low	living	related	n/a	n/a	2013-09-30	600
2010-09-15	low	living	related	n/a	n/a	2013-09-30	1111
2011-08-31	low	living	unrelated	n/a	n/a	2013-09-30	761
2010-10-20	low	living	related	n/a	n/a	2013-09-30	1076
2011-03-02	low	living	related	n/a	n/a	2013-09-30	943
2013-02-20	low	living	related	n/a	n/a	2013-09-30	222
2010-11-10	low	living	related	n/a	n/a	2013-09-30	1055
2012-03-14	low	living	related	n/a	n/a	2013-09-30	565
2010-11-24	low	living	related	n/a	n/a	2013-09-30	1041
2012-05-23	low	living	unrelated	n/a	n/a	2013-09-30	495
2011-10-05	low	living	unrelated	n/a	n/a	2013-09-30	726
2012-08-22	low	living	related	n/a	n/a	2013-09-30	404
2012-10-10	low	living	unrelated	n/a	n/a	2013-09-30	355
2011-06-29	low	living	related	n/a	n/a	2013-09-30	824
2010-07-21	low	living	related	n/a	n/a	2013-09-30	1167
2011-11-23	low	living	related	n/a	n/a	2013-09-30	677
2013-05-29	low	living	related	n/a	n/a	2013-09-30	124
2011-02-16	low	living	related	n/a	n/a	2013-09-30	957
2013-06-05	low	living	related	n/a	n/a	2013-09-30	117
2012-06-06	low	living	related	n/a	n/a	2013-09-30	481
2011-01-05	low	living	related	n/a	n/a	2013-09-30	999
2011-01-26	low	living	related	n/a	n/a	2013-09-30	978
2011-12-07	low	living	related	n/a	n/a	2013-09-30	663
2013-06-19	low	living	related	n/a	n/a	2013-09-30	103
2010-08-11	low	living	related	n/a	n/a	2013-09-30	1146
2011-10-12	low	living	related	n/a	n/a	2013-09-30	719
2011-10-26	low	living	related	n/a	n/a	2013-09-30	705
2010-12-01	low	living	related	n/a	n/a	2013-09-30	1034
2012-07-25	low	living	related	n/a	n/a	2013-09-30	432
2013-02-06	low	living	related	n/a	n/a	2013-09-30	236
2012-07-18	low	living	related	n/a	n/a	2013-09-30	439
2010-09-29	low	living	related	n/a	n/a	2013-09-30	1097
2010-12-08	low	living	related	n/a	n/a	2013-09-30	1027
2012-02-15	low	living	related	n/a	n/a	2013-09-30	593
2011-04-06	low	living	related	n/a	n/a	2013-09-30	908
2011-03-23	low	living	related	n/a	n/a	2013-09-30	922
2012-10-10	low	living	related	n/a	n/a	2013-09-30	355
2012-11-07	low	living	related	n/a	n/a	2013-09-30	327
2012-10-17	low	living	related	n/a	n/a	2013-09-30	348
2011-05-25	low	living	related	n/a	n/a	2013-09-30	859
2011-02-02	low	living	related	n/a	n/a	2013-09-30	971
2012-04-25	low	living	related	n/a	n/a	2013-09-30	523
2012-09-12	low	living	related	n/a	n/a	2013-09-30	383
2012-10-31	low	living	related	n/a	n/a	2013-09-30	334
2012-09-05	low	living	related	n/a	n/a	2013-09-30	390
2012-03-21	low	living	related	n/a	n/a	2013-09-30	558
2012-12-12	low	living	related	n/a	n/a	2013-09-30	292
2012-05-16	low	living	related	n/a	n/a	2013-09-30	502
2012-02-22	low	living	related	n/a	n/a	2013-09-30	586
2012-05-02	low	living	related	2013-09-25	n/a	2013-09-30	511
2012-12-19	low	living	related	n/a	n/a	2013-09-30	285
2011-05-25	low	living	related	n/a	n/a	2013-09-30	859
2012-08-29	low	living	related	n/a	n/a	2013-09-30	397
2012-09-19	low	living	unrelated	n/a	n/a	2013-09-30	376
2012-11-07	low	living	unrelated	n/a	n/a	2013-09-30	327
2011-10-28	low	living	unrelated	n/a	n/a	2013-09-30	703
2010-11-24	low	living	unrelated	n/a	n/a	2013-09-30	1041
2013-03-20	low	living	unrelated	n/a	n/a	2013-09-30	194
2013-03-06	low	living	unrelated	n/a	n/a	2013-09-30	208
2012-01-04	low	living	unrelated	n/a	n/a	2013-09-30	635
2013-04-03	low	living	unrelated	n/a	n/a	2013-09-30	180
2011-05-11	low	living	unrelated	n/a	n/a	2013-09-30	873
2011-10-12	low	living	unrelated	n/a	n/a	2013-09-30	719
2011-06-15	low	living	unrelated	n/a	n/a	2013-09-30	838
2013-04-24	low	living	unrelated	n/a	n/a	2013-09-30	159
2010-11-03	low	living	unrelated	n/a	n/a	2013-09-30	1062
2011-06-01	low	living	unrelated	n/a	n/a	2013-09-30	852
2011-08-03	low	living	unrelated	n/a	n/a	2013-09-30	789
2011-08-31	low	living	unrelated	n/a	n/a	2013-09-30	761
2011-08-19	low	living - altruistic	unrelated	n/a	n/a	2013-09-30	773
2012-10-30	low	living - altruistic	unrelated	n/a	n/a	2013-09-30	335
2012-09-25	low	living - altruistic	unrelated	n/a	n/a	2013-09-30	370
2012-02-22	low	living - altruistic	unrelated	n/a	n/a	2013-09-30	586
2011-02-02	low	living - altruistic	unrelated	n/a	n/a	2013-09-30	971
2012-08-22	low	living - altruistic	unrelated	n/a	n/a	2013-09-30	404
2010-07-16	low	living - altruistic	unrelated	n/a	n/a	2013-09-30	1172
2011-08-17	low	living - altruistic	unrelated	n/a	n/a	2013-09-30	775
2013-04-26	low	living - paired	unrelated	n/a	n/a	2013-09-30	157
2012-08-15	low	living - paired	unrelated	n/a	n/a	2013-09-30	411
2012-01-18	low	living - paired	unrelated	n/a	n/a	2013-09-30	621
2011-12-14	low	living - paired	unrelated	n/a	n/a	2013-09-30	656
2012-06-27	low	living - paired	unrelated	n/a	n/a	2013-09-30	460
2012-09-25	low	DBD	n/a	n/a	n/a	2013-09-30	370
2010-08-28	low	DBD	n/a	n/a	n/a	2013-09-30	1129
2012-04-27	low	DBD	n/a	n/a	n/a	2013-09-30	521
2010-10-06	low	living	unrelated	n/a	n/a	2013-09-30	1090
2010-08-18	low	living	unrelated	n/a	n/a	2013-09-30	1139

## Sheet: Sheet5
Initial regimen	GFR 3 mo (MDRD)	GFR 6 mo (MDRD)	GFR 1 yr (MDRD)	GFR 2 yr (MDRD)	GFR 3 yr (MDRD)
low	13	15	12	13
low	29	44	25	19	32
low	29	25	27	24
low	44	38	37	30
low	27	31	28	33
high	32	33	40	38
low	38	49	49	38
high	35	34	46	39
high	30	28	32	40	41
high	25	34	37	40
low	40	39	44	40
high	39	50	58	41	52
low	36	43	40	42
low	45	50	47	45	48
low	35	36	47	45
high	40	41	49	45	47
low	39	45	43	46	51
low	58	54	50	46	45
low	39	45	54	47
high	56	63	55	47	na
high	52	59	58	47	44
low	42	47	41	48	47
high	47	43	44	48
low	37	45	43	49	56
high	59	56	47	49
high	42	50	47	50	48
high	55	59.5	49	51	58
low	51	48	52	51	67
low	44	3.5	49	53	na
low	57	52	49	53	56
low	53	53	57	53	na
high	46	44	47	54	54
high	50	50	56	54
low	57	54	57	55	74
low	59	52	50	59
low	58	63.2	58	59
low	43	63.8	61.8	59
high	51	64.8	69.4	59.9	na
high	57.6	66	68.4	61.2	na
high	66	73.1	72.2	62.7
low	57.6	68.4	49.2	63.6
high	50	61.9	61	64	88
low	46	66.8	60.3	64.4	na
low	77.5	74.6	69.8	66.4
high	58	70	73	66.8
low	41	50	52	67
low	58	54	54	67
high	69.4	75.3	69	67
low	52	61.4	60.1	69
high	63.3	71.3	66.4	69
high	79.7	84.3	89.1	69.7	na
low	51	59	73.4	71.4	76
low	64.4	76.6	79.1	72.8	86
high	55	58.4	71.2	73.5
high	46	89.1	92.3	77.9	101
low	90	91.6	86.4	79
low	70.2	67.3	69.8	79.5	91
low	59	62.8	70.5	83
low	58	65.1	71.4	87
high	61	69.7	75.3	90.4	77.4
low	99.5	93.4	96.1	100.5
low	109.5	133	134.8	124.3
high	56	63.5	55	n/a
low	46	44	n/a	n/a
low	10	18	21	na	na
low	24	15	30	na	na
high	31	31	31	na	na
high	24	30	34	na	na
low	65.7	75.2	40	na	na
low	45	42	41	na	na
low	37	44	43	na	na
low	40	44	43	na	na
low	49	51	43	na	na
high	54	58	44	na	41
low	37	45	44	na	na
high	54	53	47	na	na
low	43	45	47	na	na
low	46	42	50	na	na
high	47	49	52	na	na
low	51	54	52	na	na
low	47	53	53	na	na
low	48	45	53	na	na
low	51	60.2	56	na	na
high	59	58	57	na	na
low	45	50	57	na	na
low	46	54	57	na	na
low	55	59.8	57	na	na
low	55	58	59	na	na
low	57	62.9	59.5	na	na
low	34	59	59.7	na	na
high	53	60.5	60.9	na	na
low	38	65.5	61.2	na	na
low	50	57	61.9	na	na
high	54	65	62.9	na	na
low	59.5	77.5	63.4	na	na
low	48	54	63.6	na	na
low	61.5	62.5	64.6	na	na
low	59	59	66.6	na	na
high	73	62.7	67.7	na	na
low	53	70.7	68.3	na	na
high	56	94.2	69.2	na	na
low	61.9	70	78.6	na	na
low	56.6	84	79.2	na	na
low	54	76.3	85.3	na	na
low	74.6	89.5	89.2	na	na
high	63	78.1	90.6	na	na
low	74.8	92	92	na	na
low	77.2	93.4	93	na	na
low	106.4	108.3	106.1	na	na
low	83.6	87.1	115	na	na
low	36	36	9
low	9	19	15
low	26	26	23
low	13	27	25
low	25	27	27
low	26	26	31
low	26	32	31
low	30	28	31
low	30	32	31
low	30	32	31
high	32	23	33
low	47	40	34
low	27	30	36
low	29	20	36
high	46	43	37
high	35	51	38
low	30	33.6	38.4
low	43	39	39
high	32	34	40
low	24	32	40
low	24	36	40
low	46	50	40
high	34	35	41
high	29	43	42
low	42	46	42
low	49	44	42
low	50	42	42
low	36	43	43
low	36	45.6	44.4
low	28	42	45
low	39	41	45
low	57	68.5	45
high	54	50	46
high	54	53	46
low	48	44	46
low	67.5	62.1	46
low	35	48	48
low	45	53	48
low	57	51	48
low	42	53	49
low	67	68	49
low	36	48	49.2
low	34	50	50
low	44	56	50
high	67.2	58.8	50.4
low	48	55.2	50.4
high	48	46	51
low	49	58	51
low	51	42	51
low	56	59	52
low	73	54	52
low	40	46	53
low	48	54	53
low	57	76.2	53
low	36	43	54
low	43	52	54
low	46	55	55
low	43	46	57
low	47	53	57
low	50	52	57
low	52	49	57
low	83.9	93.5	58
low	41	50	59
low	42	51	59
low	51	55	59
low	56	60	59
low	57	57	59
high	58	55	60
low	49	56	60
low	52	57	60
low	69.1	63.9	60
High	75	55	62.1
high	62.1	66.1	63.5
low	58	57	64
high	63.6	60.8	65.2
low	42	74	66
low	45	65	66
low	44	67	67
low	77	77	67
low	68.9	60.1	67.3
high	55	73.6	68
high	51	55	69.4
high	59.5	58	70
low	80	76	70
low	63.6	69.6	70.5
low	64	72	71
low	75	65	71
low	58	66	71.1
High	64	74	73
high	69.3	56.8	73.5
low	51	67.1	74
high	54	59	75
low	59	74.4	75
low	79.5	82.7	88.1
high	78.2	76.6	90
low	64.5	94.8	92.8
low	69.8	83.4	94
low	83	81	96
high	101.1	110.3	97
low	76.4	87.9	104
low	93.1	95.9	107.9
low	114	115	117
low	92.6	111.8	123.9
low	61.5	87.9	129
low	25	lost to fu	lost to fu
low	57	61.4	n/a
low	27	38	STG
high	28	42
high	28	43
high	35	43
high	36	45
high	37	42
high	40	29
high	47	42
high	48	72.1
high	51	56
high	58	47
high	65	75
high	76	56
high	84.3	91
low	8	19
low	13	18
low	18	24
low	19	13
low	23	23
low	23	30
low	23	41
low	28	29
low	31	na
low	32	45
low	32
low	32
low	34	22
low	34	37
low	34	40
low	36	38.4
low	36	55
low	37	40
low	37	48
low	39	na
low	39.6
low	40	39
low	40	41
low	40	43
low	40	43
low	43	51
low	44	57
low	47	47
low	48	47
low	49	44
low	51	51
low	51	52
low	52	64
low	53	58
low	54	56
low	55	55
low	55
low	57	90
low	58	53
low	59	77
low	60.7	77
low	63	71
low	64.5	77
low	65	57
low	65	65
low	66	62.4
low	66	81
low	66
low	66.1
low	69	71
low	69	75
low	71	71
low	72
low	81.6	57
low	87	81
low	89

## Sheet: Sheet6
DBD	high	24	30	34	na	na
DBD	high	56	63.5	55	n/a
DBD	high	55	59.5	49	51	58
DBD	high	39	50	58	41	52
DBD	high	48	72.1
DBD	high	54	53	46
DBD	high	47	43	44	48
DBD	high	50	50	56	54
DBD	high	25	34	37	40
DBD	high	37	42
DBD	high	40	29
DBD	high
DBD	high	67.2	58.8	50.4
DBD	high	58	47
DBD	high	101.1	110.3	97
DBD	high	32	23	33
DBD	high	54	59	75
DBD	high	65	75
DBD	high	35	43
DBD	high	36	45
DBD	high	34	35	41
DBD	high	59	56	47	49
DBD	high	29	43	42
DBD	high	32	34	40
DBD	high	69.3	56.8	73.5
DBD	high	58	70	73	66.8
DBD	high	28	43
DCD	high	63	78.1	90.6	na	na
DCD	high	46	89.1	92.3	77.9	101
DCD	high	28	42
DCD	high	48	46	51
living	high	54	53	47	na	na
living	high	31	31	31	na	na
living	high	53	60.5	60.9	na	na
living	high	73	62.7	67.7	na	na
living	high	56	63	55	47	na
living	high	79.7	84.3	89.1	69.7	na
living	high	51	64.8	69.4	59.9	na
living	high	47	49	52	na	na
living	high	52	59	58	47	44
living	high	30	28	32	40	41
living	high	40	41	49	45	47
living	high	54	58	44	na	41
living	high	46	44	47	54	54
living	high	42	50	47	50	48
living	high	50	61.9	61	64	88
living	high	61	69.7	75.3	90.4	77.4
living	high	32	33	40	38
living	high	55	58.4	71.2	73.5
living	high	59.5	58	70
living	high	78.2	76.6	90
living	High	75	55	62.1
living	high	55	73.6	68
living	high	58	55	60
living	high	47	42
living	high	35	34	46	39
living	high	63.3	71.3	66.4	69
living	high	62.1	66.1	63.5
living	high	69.4	75.3	69	67
living	High	64	74	73
living	high	76	56
living	high	66	73.1	72.2	62.7
living	high	35	51	38
living - altruistic	high	46	43	37
living - altruistic	high	84.3	91
living - altruistic	high	51	56
living - paired	high	63.6	60.8	65.2
living - paired	high	54	50	46
living - paired	high	51	55	69.4
DBD	low	45	50	57	na	na
DBD	low	74.8	92	92	na	na
DBD	low	77.2	93.4	93	na	na
DBD	low	65.7	75.2	40	na	na
DBD	low	48	45	53	na	na
DBD	low	55	59.8	57	na	na
DBD	low		na	na	na	na
DBD	low	59.5	77.5	63.4	na	na
DBD	low	24	15	30	na	na
DBD	low	n/a	n/a	n/a	n/a	n/a
DBD	low	46	44	n/a	n/a
DBD	low	n/a	n/a	n/a	n/a	n/a
DBD	low	45	50	47	45	48
DBD	low	37	45	43	49	56
DBD	low	18	24
DBD	low	13	15	12	13
DBD	low	36	43	43
DBD	low	29	20	36
DBD	low	36	38.4
DBD	low	47	53	57
DBD	low	40	46	53
DBD	low	89
DBD	low	52	61.4	60.1	69
DBD	low	66	62.4
DBD	low	57	51	48
DBD	low	68.9	60.1	67.3
DBD	low	51	51
DBD	low	29	25	27	24
DBD	low	30	32	31
DBD	low	44	57
DBD	low	58	57	64
DBD	low	47	47
DBD	low	59	77
DBD	low	26	26	31
DBD	low	75	65	71
DBD	low	23	30
DBD	low	52	64
DBD	low	42	74	66
DBD	low	27	31	28	33
DBD	low	36	43	54
DBD	low	51	52
DBD	low	49	44	42
DBD	low	55	55
DBD	low	50	42	42
DBD	low	57	61.4	n/a
DBD	low	114	115	117
DBD	low	34	37
DBD	low	93.1	95.9	107.9
DBD	low	39.6
DBD	low	25	lost to fu	lost to fu
DBD	low	66.1
DBD	low	63.6	69.6	70.5
DBD	low	57	90
DBD	low	37	48
DBD	low	83	81	96
DBD	low	25	27	27
DBD	low	73	54	52
DBD	low	54	56
DBD	low	65	57
DBD	low	42	51	59
DBD	low	47	40	34
DBD	low	43	46	57
DBD	low	61.5	87.9	129
DBD	low	37	40
DBD	low	77	77	67
DBD	low	56	59	52
DBD	low	42	53	49
DBD	low	64.5	77
DBD	low	27	38	STG
DBD	low	69.8	83.4	94
DBD	low	36	48	49.2
DBD	low
DBD	low
DBD	low	58	63.2	58	59
DBD	low	58	54	54	67
DBD	low	41	50	52	67
DBD	low	35	36	47	45
DBD	low
DBD	low	56	60	59
DBD	low	48	47
DBD	low	32	45
DBD	low	87	81
DBD	low	36	55
DBD	low	43	51
DBD	low	59	74.4	75
DBD	low	28	29
DBD	low	66	81
DBD	low	n/a	na	na
DBD	low	8	19
DBD	low	35	48	48
DBD	low	46	50	40
DBD	low	26	32	31
DBD - dual	low	31	na
DCD	low	106.4	108.3	106.1	na	na
DCD	low	51	60.2	56	na	na
DCD	low	48	54	63.6	na	na
DCD	low	61.5	62.5	64.6	na	na
DCD	low	61.9	70	78.6	na	na
DCD	low	37	44	43	na	na
DCD	low	46	66.8	60.3	64.4	na
DCD	low	42	47	41	48	47
DCD	low	51	59	73.4	71.4	76
DCD	low	30	28	31
DCD	low	9	19	15
DCD	low	26	26	23
DCD	low	23	23
DCD	low	19	13
DCD	low	34	22
DCD	low	49	44
DCD	low	30	32	31
DCD	low	13	18
DCD	low	49	58	51
DCD	low	65	65
DCD	low
DCD	low	32
DCD	low	23	41
DCD	low	36	45.6	44.4
DCD	low	30	33.6	38.4
DCD	low	40	39
DCD	low	90	91.6	86.4	79
DCD	low	92.6	111.8	123.9
DCD	low	80	76	70
DCD	low	n/a	n/a
DCD	low	36	43	40	42
DCD	low	24	36	40
DCD	low	40	43
DCD	low	40	41
DCD	low	48	54	53
DCD	low	64.5	94.8	92.8
DCD	low	58	53
DCD	low	58	66	71.1
DCD	low	60.7	77
DCD	low
DCDx2	low	39	na
living	low	47	53	53	na	na
living	low	10	18	21	na	na
living	low	50	57	61.9	na	na
living	low	49	51	43	na	na
living	low	44	3.5	49	53	na
living	low	56.6	84	79.2	na	na
living	low	55	58	59	na	na
living	low	38	65.5	61.2	na	na
living	low	74.6	89.5	89.2	na	na
living	low	34	59	59.7	na	na
living	low	83.6	87.1	115	na	na
living	low	51	54	52	na	na
living	low	46	54	57	na	na
living	low	46	42	50	na	na
living	low	53	53	57	53	na
living	low	43	45	47	na	na
living	low	40	44	43	na	na
living	low	59	59	66.6	na	na
living	low	57	62.9	59.5	na	na
living	low	53	70.7	68.3	na	na
living	low	37	45	44	na	na
living	low	45	42	41	na	na
living	low	n/a	n/a	n/a	n/a	n/a
living	low	29	44	25	19	32
living	low	58	54	50	46	45
living	low	57	52	49	53	56
living	low	51	48	52	51	67
living	low	41	50	59
living	low	43	39	39
living	low	42	46	42
living	low	52	49	57
living	low	57	68.5	45
living	low	40	43
living	low	51	67.1	74
living	low	43	52	54
living	low	59	62.8	70.5	83
living	low	59	52	50	59
living	low	32
living	low	43	63.8	61.8	59
living	low	72
living	low	57	57	59
living	low	66
living	low	44	56	50
living	low	63	71
living	low	45	65	66
living	low	83.9	93.5	58
living	low	51	55	59
living	low	69.1	63.9	60
living	low	64	72	71
living	low	57.6	68.4	49.2	63.6
living	low	39	45	54	47
living	low	57	76.2	53
living	low	50	52	57
living	low	34	50	50
living	low	51	42	51
living	low	76.4	87.9	104
living	low	69	71
living	low	27	30	36
living	low	52	57	60
living	low	28	42	45
living	low	71	71
living	low	36	36	9
living	low	44	67	67
living	low	39	41	45
living	low	40	39	44	40
living	low	81.6	57
living	low	55
living	low	69	75
living	low	99.5	93.4	96.1	100.5
living	low	49	56	60
living	low	44	38	37	30
living	low	53	58
living	low	58	65.1	71.4	87
living	low	109.5	133	134.8	124.3
living - altruistic	low	54	76.3	85.3	na	na
living - altruistic	low	64.4	76.6	79.1	72.8	86
living - altruistic	low	38	49	49	38
living - altruistic	low	48	55.2	50.4
living - altruistic	low	67.5	62.1	46
living - altruistic	low	79.5	82.7	88.1
living - altruistic	low	67	68	49
living - altruistic	low	77.5	74.6	69.8	66.4
living - paired	low	34	40
living - paired	low	45	53	48
living - paired	low	46	55	55
living - paired	low	48	44	46
living - paired	low	24	32	40
DBD	low	39	45	43	46	51
DBD	low	13	27	25
living	low	57	54	57	55	74
living	low	70.2	67.3	69.8	79.5	91

## Sheet: Sheet7
Initial regimen	Tac conc (d2/3)	Tac conc (d7)	Tac conc (d60)	Tac conc (d180)	Tac conc (1yr)	Tac conc (2yr)	Tac conc (3yr)
high	18	14.9	7.8	4.3	3.8
high	17.1	9.6	9.3	8.8	4.2	3.8	6.4
High	8.8	9.9	7.1	6.9	4.3
high	7.9	12.2	9.2	sirolimus	4.5
high	18.8	14.4	6.6	7.8	4.8	5.6
high	11.7	8.8	10.2	5	4.9	6.3
high	16.6	10.9	10.3	6.5	5.1	7.7	6.1
High	3.8	4.6	8.1	5	5.1	na	na
high	6.9	14.8	10	7.6	5.2
high	6.8	4.6	10.5	7.4	5.2	5.8
high	18.6	10.8	6.4	6.3	5.2	4.2	na
high	14.7	15.2	8.8	5.9	5.2
high	32	13.4	9.3	11.3	5.4	na	na
high	19.7	13.7	11	8.3	5.5
high	11.2	15.6	20.6	8.8	5.6	11.7
high	12.3	8.3	6.8	3.9	5.8	4.5	na
high	26.3	15.6	10.7	6.4	6.1	9.5	7
high	7.6	9.9	10.8	2.4	6.1	5.3
high	18.6	9.7	7.2	8	6.2	9.4
high	10.3	12.6	9.2	5.3	6.2	7.9
high	10.9	11.1	10.3	12.2	6.3	7.7	na
high	20	12.4	9.1	7.6	6.3	5.2
high	10.5	7.2	9.3	6.6	6.3	na	na
high	24.2	13.5	8.5	7.6	6.4	5.3	na
high	8.8	10.4	6.5	6.4	6.4	7
high	3.5	4.7	8.2	6.1	6.5	na	na
high	24.7	13.4	8.4	6	6.6	7.8	6.9
high	11.5	11.5	11	10.2	6.7	4.5	6.7
high	19.6	11.3	10.5	7	6.7	7.2	na
high	8.6	8.2	11.1	8	6.8	4.5	na
high	11.1	10.2	10.5	7.8	6.8	4.4	na
high	12.6	12.9	9.6	10.3	7	na	na
high	7.2	19.6	10.1	7.6	7.1	na	na
high	7.7	7.3	8.8	7.2	7.1	7.7	7.2
high	14.6	14.6	17.8	6.4	7.1	6.4	6.9
high	12.2	7.4	8	6.1	7.1	5.3
high	18.5	8.2	5.5	9.9	7.3	na	na
high	9.8	10	11.3	7.5	7.3	na	na
high	12.5	8.2	8.4	8.1	7.4	na	na
high	14.5	8.8	10.3	11.9	7.5
high	14.8	10	6.3	4.8	7.5	na	na
high	10.3	17.1	5.9	10.5	7.6	na	na
high	12.6	13.1	9.8	6	7.7	6	na
high	5.2	9.2	8.7	7.8	7.8	7	6.2
high	10	11.1	6.1	6.6	8.4	2.2
high	12.1	14.8	10	3.7	8.4	7.8	na
high	13	12	11.4	6.9	8.5	na	na
high	13.3	11.6	11.8	8.8	8.6
high	21.3	7.8	8.7	8.6	8.6	na	na
high	32	19.7	8.9	7.6	8.6	na	na
high	14.4	12.7	8.5	5.6	9
high	11	7.3	9.2	9.8	9.1	7.3	na
high	32	32	9.6	6.5	9.3	na	na
high	14.7	15.5	11.7	10.4	9.7	na	na
high	10.5	12.9	10.8	9.9	9.7	7.1	7.4
high	9.5	13.7	9.9	6.7	9.7	6.8	na
high	8.9	8.7	9	8.4	11.8	9.6	na
high	4.6	10	10.4	Cy A 204	Cya 203	Cya 269	na
high	24.5	8	11	n/a	n/a	n/a	n/a
high	19.2	12.3	n/a	n/a	n/a	n/a	n/a
high	19.6	10.4	11.1	8.6	na	na	na
high	30.2	14.3	10.3	8.1	na	na	na
high	9.9	11.8	6.1	8	na	na	na
high			9.4	7	na	na	na
high	25.9	17.8	7.7	6.8	na	na	na
high	17.8	12.2	7	5.6	na	na	na
high	12	17.3	19.2	2
high	14.4	18.5	13.6	11.7
high	21.5	6.4	12.6	10.9
high	32	15.1	10.1	7.5
high	32	17	8.1	6
high	6.5	7.8	12.4	5.9
high
low	15.8	15.2	15.8	6.7	2	7
low	19.2	2.2	7.7	7.1	2.3	4.5
low	18.7	8.8	11.7	7.2	2.6	5.6
low	7.1	10.6	12.7	5.5	2.7
low	16.4	11	11.8	5.3	3.7
low	15.7	8.8	9.1	9	3.9
low	9.6	9.5	8.1	7.6	3.9	na	na
low	8.6	21.9	9.2	12.3	4.1
low	12.1	12.6	8.9	4.5	4.1	na	na
low	8.9	13.7	7.5	8.3	4.3	na	na
low	9.9	6.9	4.6	7.5	4.4	na	na
low	26.8	13	7.9	3.9	4.4
low	5	9.9	11	7.2	4.5
low	10.6	6.3	12.4	3	4.7
low	10.9	4.6	9.8	7.2	4.8
low	11.3	15.3	9.8	6.9	4.8
low	9.5	7.4	11.6	6.7	4.9	6.7
low	25.6	12.6	10.3	5.5	4.9	5.7	na
low	2	3.9	12.5	8.2	5
low	20.6	5.9	9.4	6.9	5
low	15.5	13.8	6.4	6.7	5	8.5
low	6.7	15.5	9.5	5.6	5	5	na
low	11.2	11.6	8.5	10.1	5.2	na	na
low	14.4	15.1		5.3	5.2
low	17.1	9.5	8.6	5.2	5.2	3.7
low	23.6	21.6	16.4	8.2	5.3
low	31.6	19.5	9.9	3.4	5.3	na	na
low	22	12.4	11.4	12.7	5.4	7.4
low	3.5	6.4	15.7	7.9	5.4	na	na
low	23.2	13.1	14	5.2	5.4
low	22.6	28.1	12.4	5	5.4	6.5	7.7
low	30	21.3	9.5	8.5	5.5	6.1	na
low	17.5	10.6	7	6.3	5.5	na	na
low	12.9	12.2	6.7	8.4	5.6	na	na
low	10.9	10.1	9.7	6.3	5.6	5.1	na
low	20.8	14.1	9.3	3	5.6	4.8
low	11.6	8.2	9.7	7.9	5.8	na	na
low	11.7	10.7	10.7	7.7	5.8	5.1
low	18	11.6	7.8	6.4	5.8
low	19.8	9	14.8	2	5.9
low	18.2	9.5	9	7.2	5.9	6.6	7.3
low	10.5	7.6	10	9.2	6
low	29.7	5.1	9.3	8.6	6
low	13.6	11.4	10.1	6.7	6
low	8.6	5.6	8.7	6	6
low	14.6	10.9	7.8	5.6	6.1	7.1
low	13.7	12.8	7.2	9.1	6.2
low	21.4	10.5	10	6.9	6.2
low	12	9.1	15.6	2.9	6.2
low	9.8	12.4	6.7	10.6	6.3
low	9.2	10.4	10.7	10.1	6.3
low	18.2	16.1	9.4	9.6	6.3
low	12.9	8.6	9.2	8.5	6.3	na	na
low	13	10.4	8	7.1	6.3	na	na
low	18.9	19	9.9	7.1	6.3	na	na
low	20.4	13.6	9.4	6.4	6.3	7.3	8.2
low	16.8	14.6	6.2	5.2	6.3
low	14.1	10.4	9.6	6.7	6.4	na	na
low	7.7	11.9	8.3	6.6	6.4	7.2
low	13.5	9.4	10.8	7.9	6.5
low	7.9	9.1	12.1	9.3	6.6	5.6	na
low	9.2	11.5	9.1	8.7	6.6	5.4
low	11.4	11	7.8	7.5	6.6	6.6	na
low	18.4	15.3	9.1	7.2	6.6
low	13.7	22.4	11.1	5.8	6.7	na	na
low	14.7	10	9.5	12.9	6.8
low	18.7	7.8	9.2	10.1	6.8	na	na
low	17.7	11.1	5.7	9.4	6.8
low	8.8	13.4	12.2	8.9	6.8
low	11.5	10.8	11	7.8	6.8	7.4
low	15.1	10.1	11.3	7.8	6.8	8.2	na
low	19.1	10.8	16.2	7.4	6.8	8.7
low	32	7	10.6	7.3	6.8
low	15.7	11.5	8.8	6.3	6.8	na	na
low	21.6	10.7	6.5	5.4	6.8	6.1	6.3
low	11.5	8.6	9.7	5.4	6.8	na	na
low	8.7	18.5	12.7	5.3	6.8	7.4	na
low	17	8.1	7.9	9.9	6.9
low	15.1	14	8.5	8	6.9	4	na
low	21.3	11.5	9.6	7.9	6.9	na	na
low	22.1	10.1	7.1	6.7	6.9	3.8	na
low	18.1	15.6	9.6	6.7	6.9	6.9	na
low	14.6	9.4	7.6	6.4	6.9	na	na
low	24.1	22.4	9.2	5.9	6.9	na	na
low	11.4	18.6	10.2	4.1	6.9	na	na
low	8.4	6.6	9	11.1	7
low	10.6	13.6	10.2	9.7	7	na	na
low	8.9	10.1	9.2	6.8	7	na	na
low	10.6	7.8	12.6	9.8	7.1	9.1	5.6
low	10.7	9.2	9.7	6.6	7.1	5.8	na
low	8.7	12	9.6	5.4	7.1	6.7	na
low	23.1	6.7	11.4	10.4	7.2	na	na
low	22.5	16.8	8.1	8.6	7.2	4.6	na
low	19.1	11.1	10.2	5.8	7.2	na	na
low	11.9	11.2	7.5	5.6	7.2	6.5	na
low	10.2	14.6	9.2	8.7	7.3	7.5	8.8
low	14.5	24.3	10.4	8.1	7.3	5.3	na
low	32	22.6	12.1	7.3	7.3	7.2
low	18.2	12	10.1	6.9	7.3	na	na
low	20.4	6.2	9.8	6.8	7.3	na	na
low	20.1	13.1	9.3	6.7	7.3	5.4
low	11.4	9.2	9.9	6.3	7.3	na	na
low	8.6	14.3	10.3	9.1	7.4	6.6	na
low	3.9	8.2	7	9	7.4	6.3
low	14.9	12.3	7.6	6.1	7.4
low	13.1	12.1	8.2	5.8	7.4
low	18.2	32	9.2	8.8	7.5
low	10.3	8.4	6.8	7.8	7.5
low	7.3	7.7	8.1	9.8	7.6	7.8	5.6
low	32	11.6	8.8	5.2	7.6	8.2	5.4
low	12.4	12.8	8	8.5	7.7	na	na
low	4.2	25.9	11.5	8.2	7.7
low	24.7	9.1	8.2	6.4	7.7	na	na
low	6.4	7.7	8.9	16.3	7.8
low	14.6	13.4	11	9.8	7.8	10.9	na
low	16.4	10.6	8.1	8.2	7.8	na	na
low	11.3	16	8.5	7	7.8	na	na
low	8.8	11.6	10.3	6.3	7.9	na	na
low	15.8	7.8	9.2	8.9	8
low	12.6	14.9	9.3	7.6	8	na	na
low	6.4	10.2	10.1	6.3	8	7.3	na
low	14.7	9.7	8.3	5.9	8	5.9
low	14.1	11.4	7.8	5.4	8	5.7
low	12.9	9.6	11	8.3	8.1
low	9.8	28.7	12.4	7.7	8.1
low	17.8	10.5	10.6	7.3	8.3	8.1	na
low	8.8	9.1	10.2	7.5	8.4
low	13.3	17.4	10.5	6.9	8.4	5.4	7.2
low	5.7	10.4	6.6	6.8	8.4	na	na
low	11	11.1	7.9	6.8	8.5	7.1
low	15.1	12.5	9.5	6.7	8.6	14.1	na
low	12	6.7	10	8.7	8.7	5.7	na
low	14.5	27.9	9	8.5	8.7
low	14.4	20.3	10.3	8.6	8.8	9.8	na
low	15.7	10	6.3	6.6	8.8
low	32	18.8	12.2	8	9	na	na
low	18.4	17.7	8.2	4.8	9.1	7.7	na
low	10.6	9.2	9.5	6.2	9.2	5.7
low	5.7	7.9	10.1	12.2	9.5	7.1	na
low	11	12.7	10.4	8.9	9.5	na	na
low	14.5	12.8	8	6.2	10
low	5.6	12.4	8.7	7.4	10.2	na	na
low	13.5	9.1	6	10.6	10.3
low	7.7	5.7	10	8.8	10.7	na	na
low	8.1	12.6	lost to fu	lost to fu	lost to fu
low	12.5	23.6	4.8	n/a	n/a	n/a	n/a
low	8.2	8.4	9.3	n/a	n/a
low	4.4	4	10.2	n/a	n/a	n/a	n/a
low	15	n/a	n/a	n/a	n/a	n/a	n/a
low	13.8	12.6	5.7	6.4	n/a
low	8	12.1		5.7	n/a	n/a	n/a
low	11.9	8.8	6.2	na	na	na	na
low	8.3	18.4	7.7	na	na	na	na
low	11	12.8	9.1	na	na	na	na
low	32	32	9.1	na	na	na	na
low	16.6	7.1	9.3	na	na	na	na
low	12	9.2	9.3	na	na	na	na
low	16.6	14.5	10.3	11.2	na	na	na
low	11.1	13.3	8.3	9.4	na	na	na
low	21.5	14.9	3.8	8.8	na	na	na
low	10.3	2.8	12.3	8.3	na	na	na
low	15.1	11.7	8.6	8.1	na	na	na
low	14.4	7.6	8.2	8	na	na	na
low	19.7	10.6	9.2	7.8	na	na	na
low	20.6	8.3	9.6	7.7	na	na	na
low	6.2	9.6	7.2	7.3	na	na	na
low	8.4	13	8.8	7.3	na	na	na
low	27.6	8.2	9.2	7.3	na	na	na
low	18.9	12.3	11.3	7.1	na	na	na
low	32	16	9.6	6.6	na	na	na
low	32	15.1	10.8	6.6	na	na	na
low	4.9	9.8	10.4	6.2	na	na	na
low	9.5	13.9	9.7	6.1	na	na	na
low	19.2	19.9	7.4	5.6	na	na	na
low	17.3	10.9	9.1	5.6	na	na	na
low	10.8	12.7	9.7	5.2	na	na	na
low	9.9	5.2	7	off Tac now	off Tac	Off tac	na
low	14.6	12.8	7.2	na		na	na
low	10.6	15.1	11.4	13.6
low	9.7	13.2	10	11.7
low	10.2	12.6	14.8	11.6
low	20.5	8.5	7.6	11.5
low	11.1	5.3	4.9	10.9
low	9.3	4.4	7.1	9
low	32	7.4	8.9	8.9
low	29.5	11.4	3	8.4
low	4.7	2	7.1	8.4
low	16.2	32	10.8	8.4
low	11.3	12.3	7	8.1
low	32	15.6	14.2	7.9
low	18.7	10.4	8.4	7.8
low	20	8.7	11.8	7.6
low	15.2	8.9	9.5	7.5
low	26.5	13.5	11.2	7.5
low	32	27.2	9.6	7.4
low	10.9	7.9	7.5	7
low	17.6	13.3	10.1	6.5
low	20.6	23.5	7.2	6.4
low	15.2	6	9.7	6.4
low	8.7	5.3	11.2	6.3
low	27	9.1	7.8	5.9
low	4.2	11	9.3	5.8		6.5
low	17.2	12.2	9.3	5.6
low	13.8	14.5	9	5.4
low	14	10.8	9.5	5.4
low	20.6	5.8	6.2	3.7
low	12.8	11.2	8	3.4
low	15.1	8.6	7.8
low	9.4	11.8	10.7
low	17.4	11.7	11.5
low	19.2	9	11.7
low	11	15.2	11.9
low	14.9	5.7	12.1
low	6.5	5.6	12.4
low	32	17.3	13.5
low
low
low
low
low
low
low	8.3	12.6	11.3	5	4.3	6	7.8
low	13.8	9	8.7	6	7.4
low	12	13.1	9.7	8.6	7.5	8.8	5.8
low	16	11.1	10.9	6.3	8.4	10.7	5.7
